# Supplementary material for: An MS-CASPT2 study of the photodecomposition of 4-methoxyphenyl azide: role of internal conversion and intersystem crossing
Source: Royal Society of Chemistry journal article supplement (doi:10.1039/c8cp00147b), 2018-01-01
Supplement: c8cp00147b1.pdf [file c8cp00147b1.pdf]

ELECTRONIC SUPPLEMENTARY INFORMATION

**An MS-CASPT2 Study of the Photodecomposition of 4-Methoxyphenyl  
Azide: Role of Internal Conversion and Intersystem Crossing**

Daniel Aranda, Francisco J. Avila, Isabel López-Tocón, Juan F. Arenas, Juan C. Otero\*,  
and Juan Soto\*

*Department of Physical Chemistry, Faculty of Science, University of Málaga,  
E-29071-Málaga, Spain*

jc\_otero@uma.es

soto@uma.es

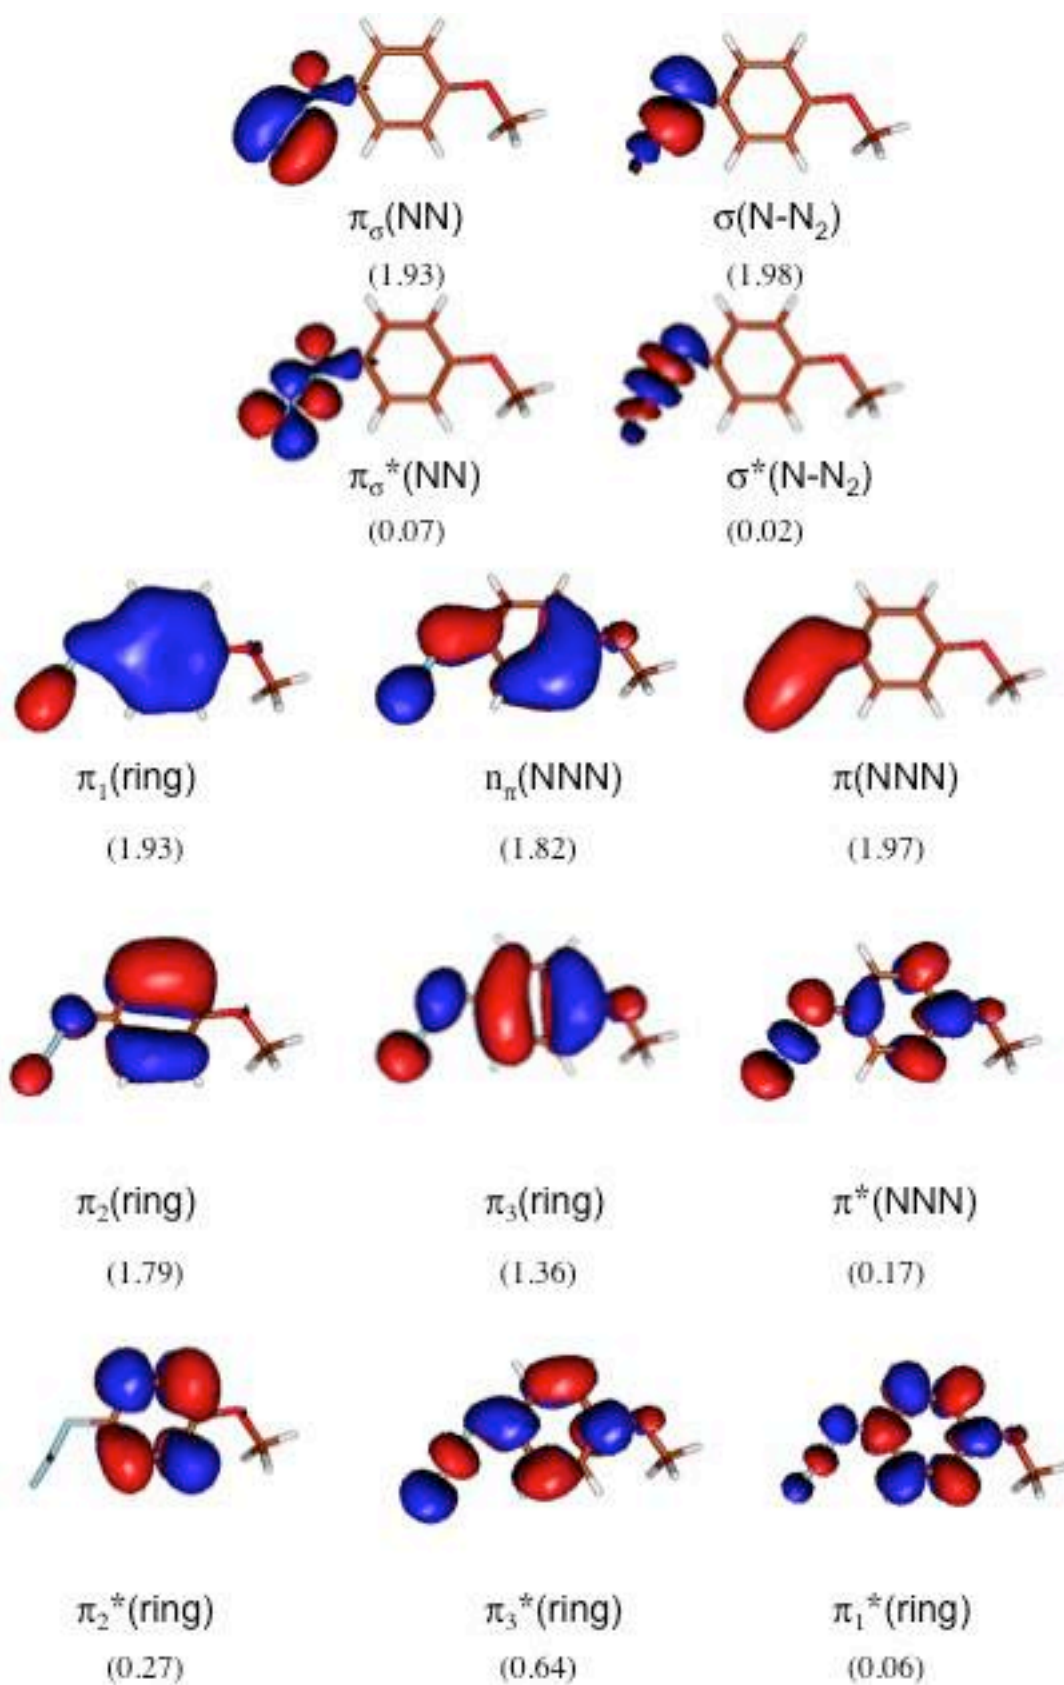

**Figure S1.** State average active orbitals included in the CAS-SCF wavefunction of 4-methoxyphenyl azide. In parenthesis, mean occupation numbers of the state average orbitals.

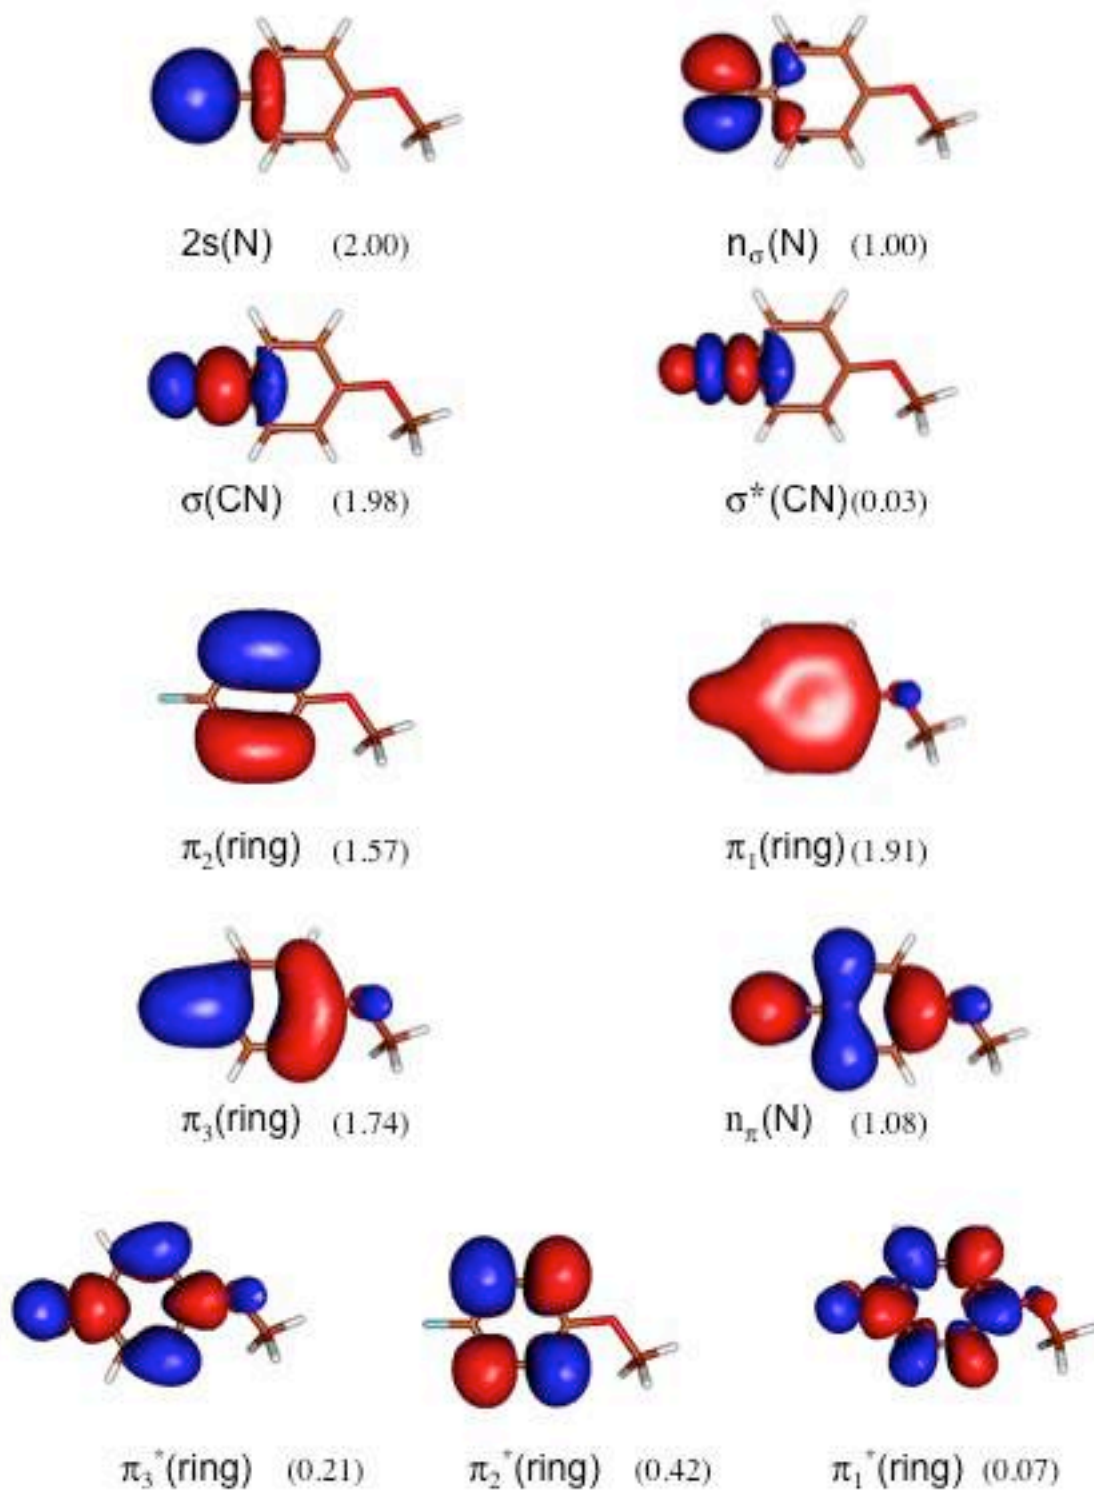

**Figure S2.** Active orbitals included in the CAS-SCF wavefunction of 4-methoxyphenyl nitrene. In parenthesis, mean occupation numbers of the state average orbitals.

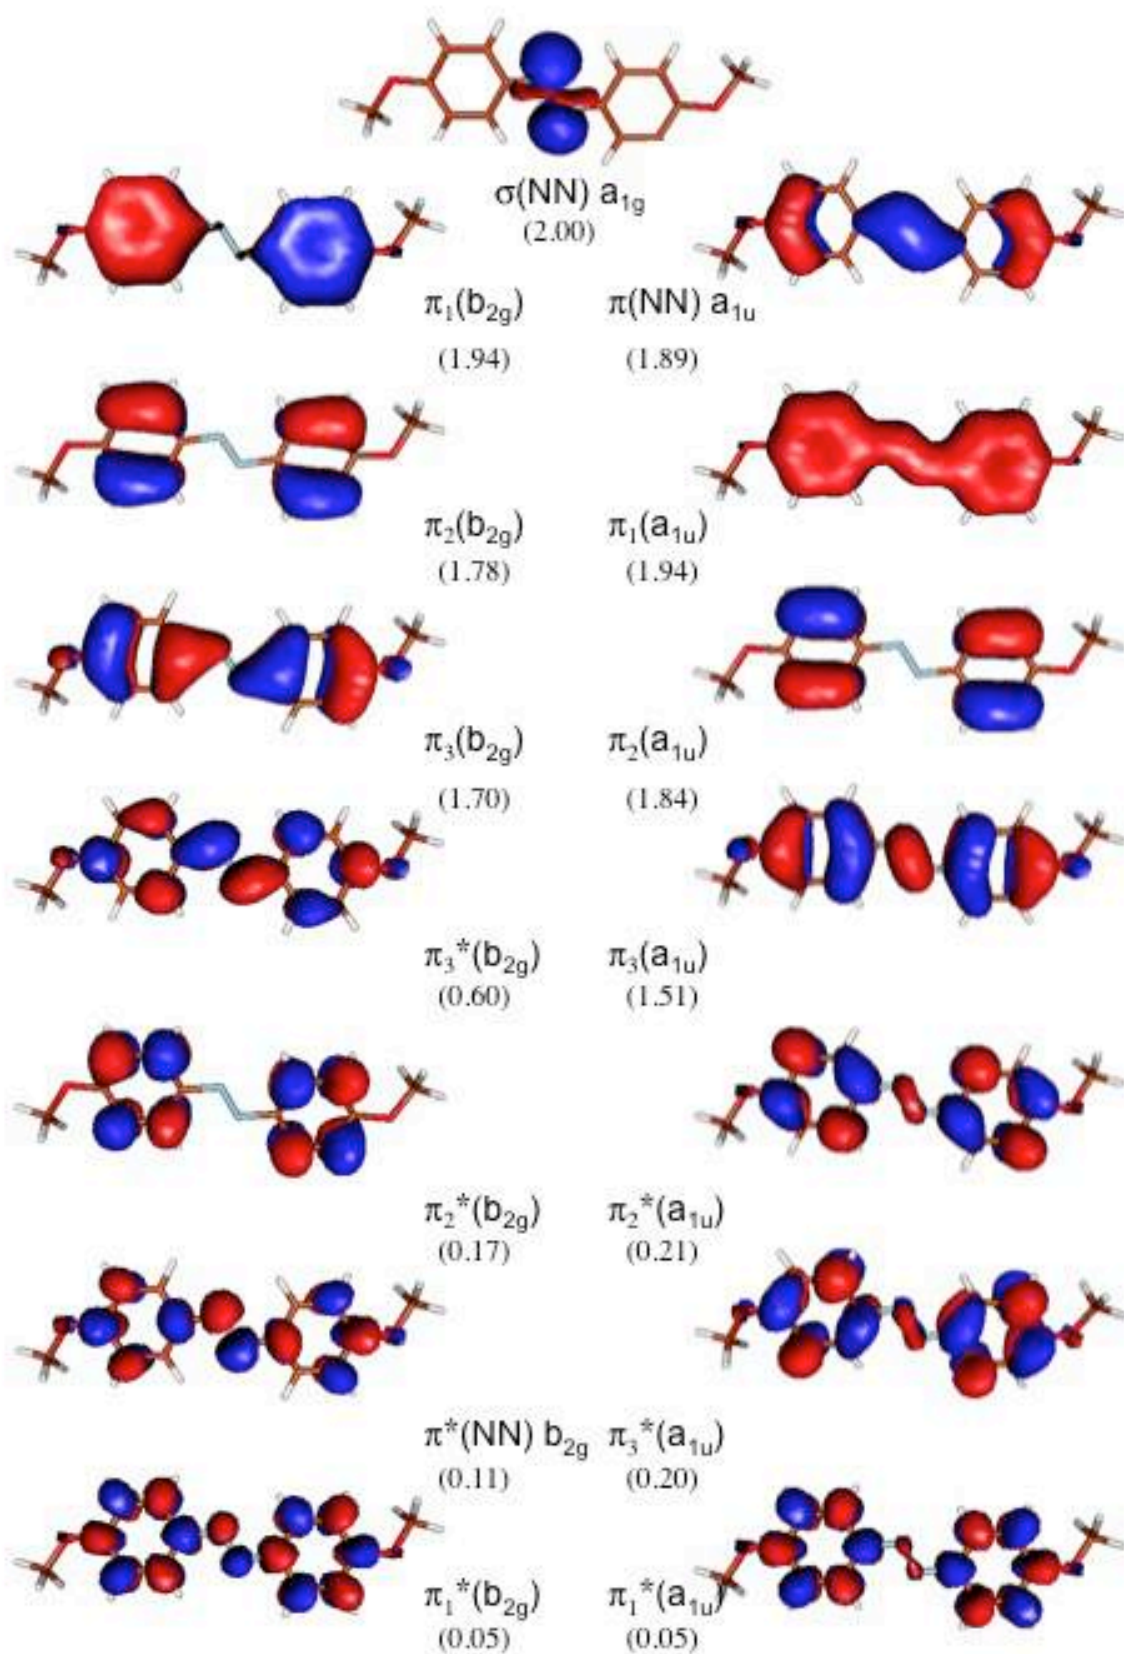

**Figure S3.** Active orbitals included in the CAS-SCF wavefunction of 4,4'-dimethoxyazobenzene. In parenthesis, mean occupation numbers of the state average orbitals.

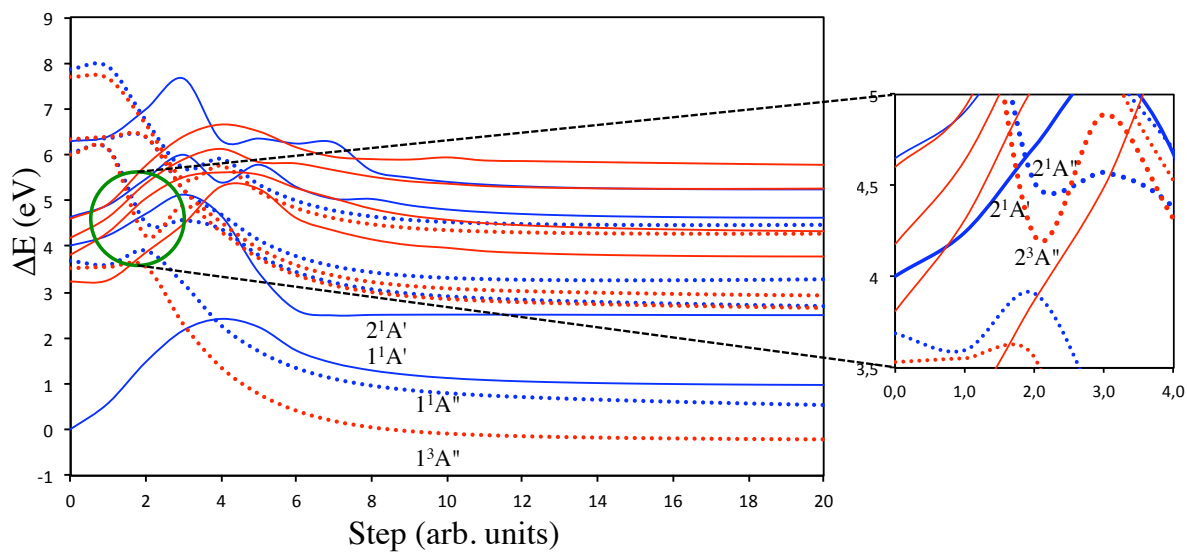

**Figure S4.** MS-CASPT2/ANO-RCC ( $C_s$  symmetry) potential energy curves of the ground and low-lying singlet and triplet excited states of 4-methoxyphenyl azide for dissociation into 4-methoxyphenyl nitrene and  $N_2$ . Four state-averaged CAS-SCF wavefunction in each symmetry block. Blue solid line: singlet  $A'$ ; red solid line: triplet  $A'$ ; blue dotted line: singlet  $A''$ ; red dotted line: triplet  $A''$ . Inset: expanded view of the  $2^1A''/2^1A'$  and  $2^1A'/2^3A''$  crossings. Final  $R(N-N_2) = 4.7 \text{ \AA}$ .

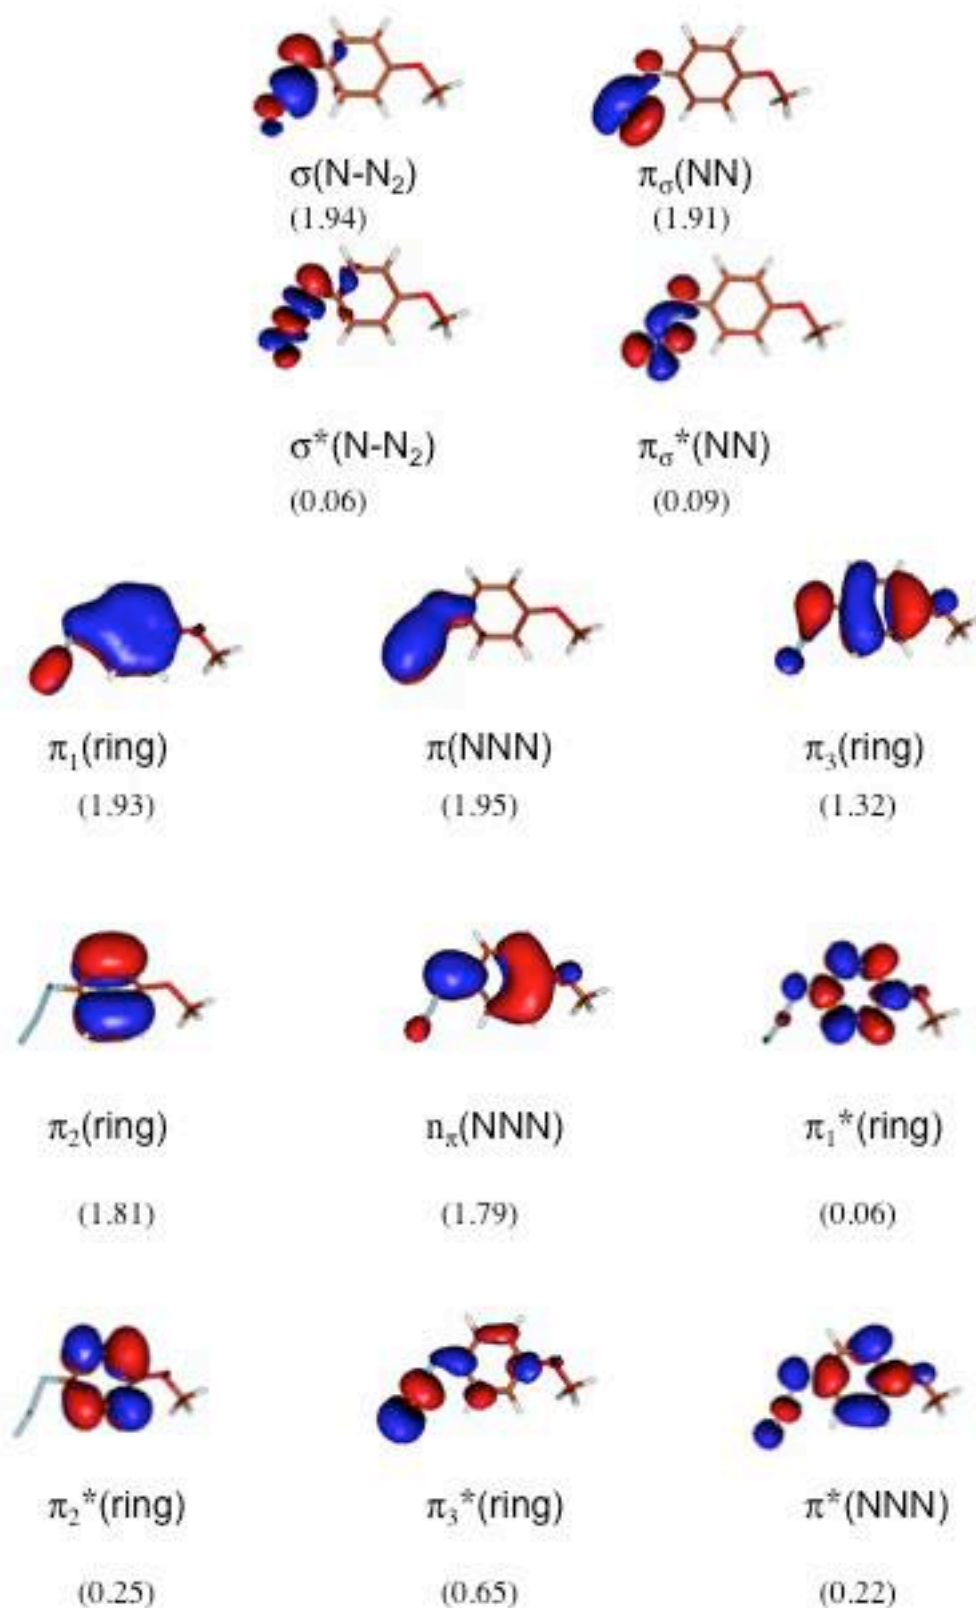

**Figure S5.** Active orbitals included in the CAS-SCF wavefunction of CI1. In parenthesis, mean occupation numbers of the state averaged orbitals.

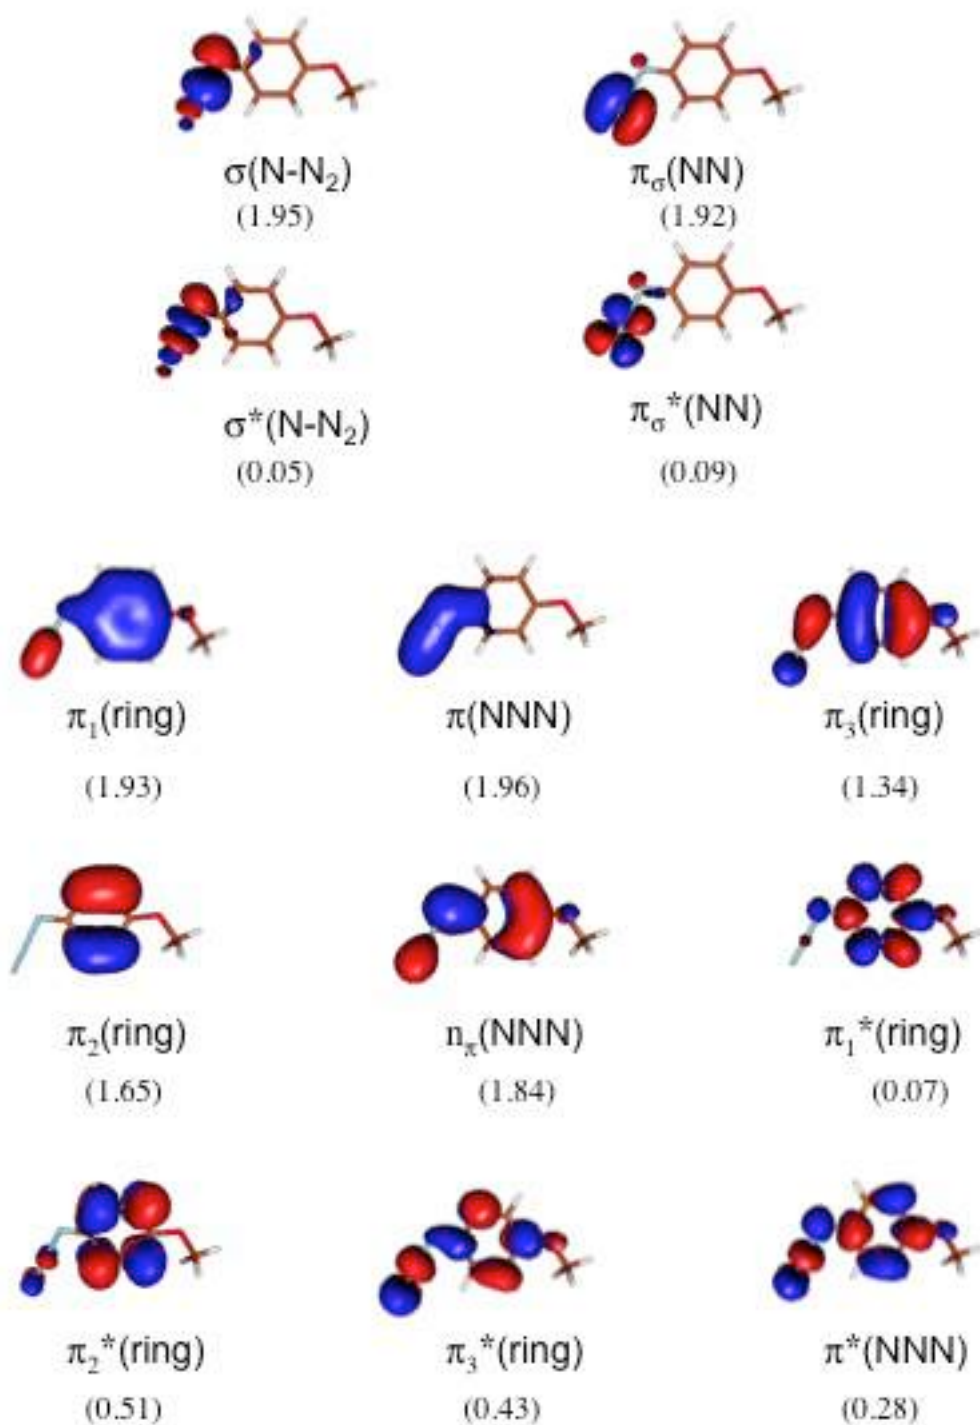

**Figure S6.** Active orbitals included in the CAS-SCF wavefunction of CI2. In parenthesis, mean occupation numbers of the state average orbitals.

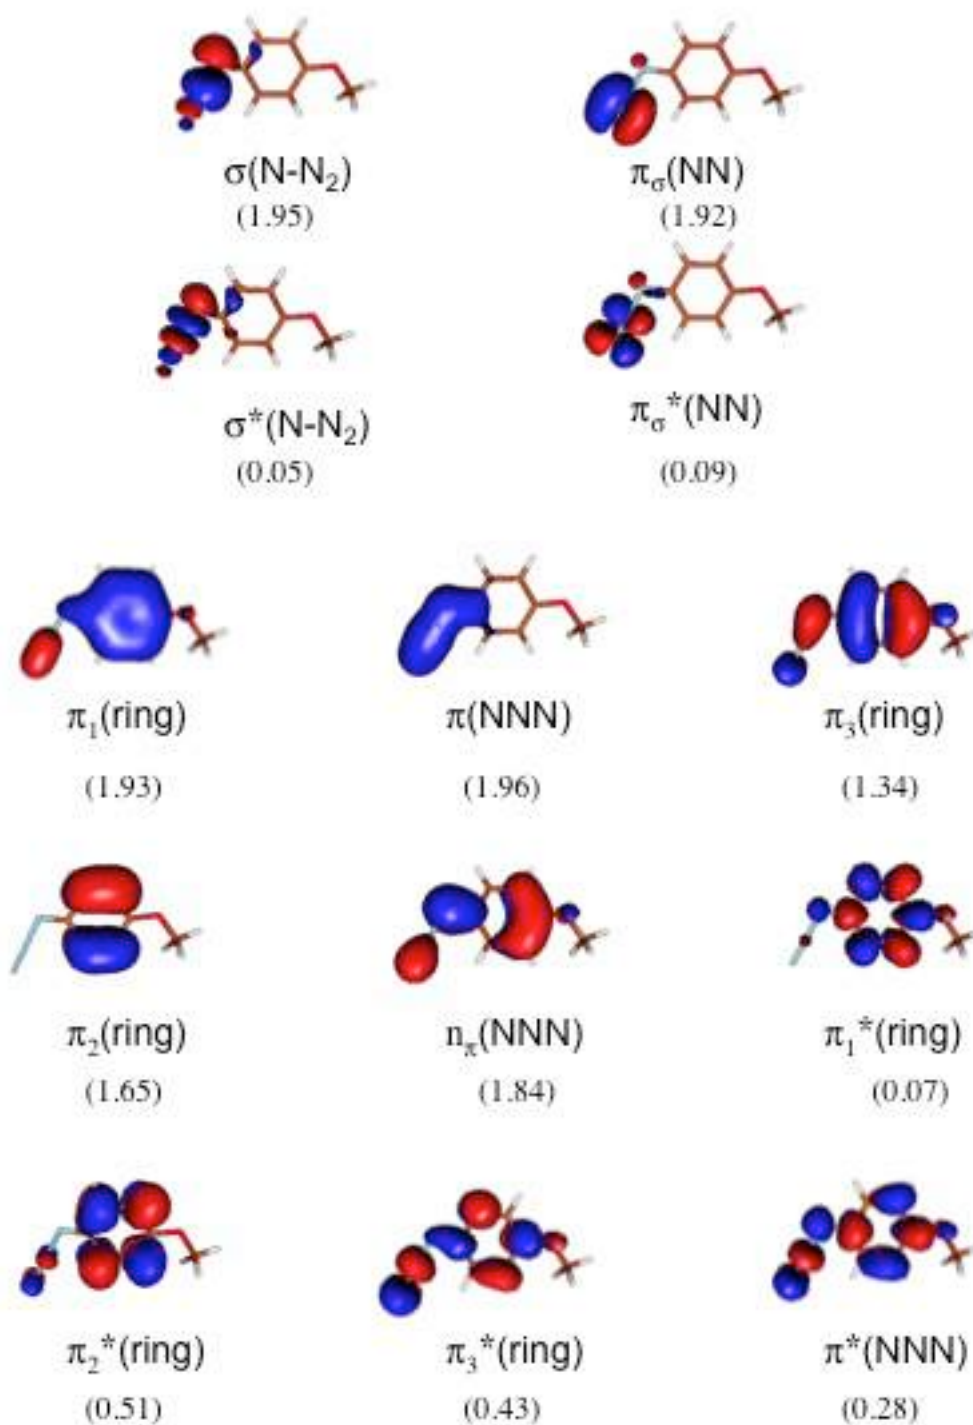

**Figure S7.** Active orbitals included in the CAS-SCF wavefunction of CI2. In parenthesis, mean occupation numbers of the state averaged orbitals.



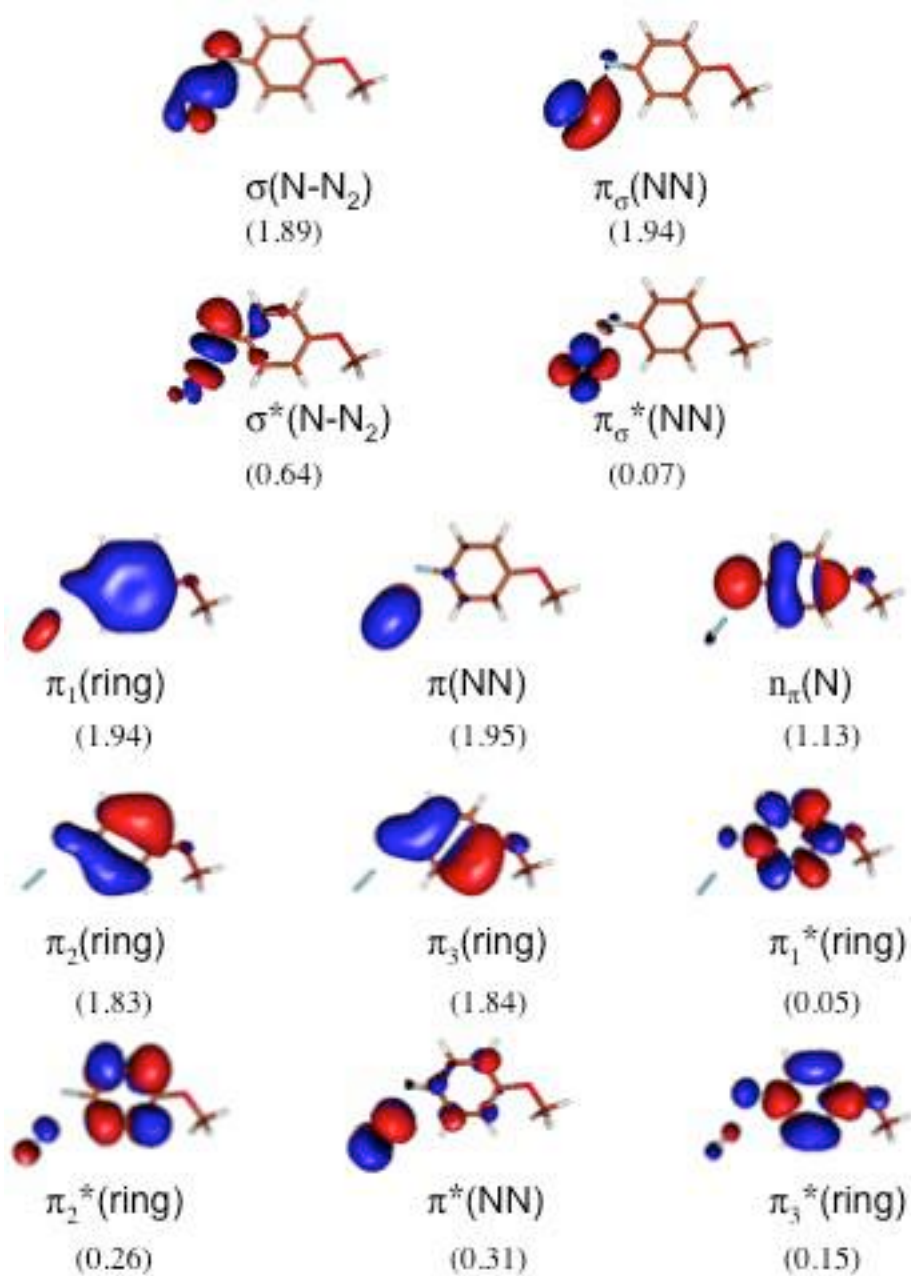

**Figure S8.** Active orbitals included in the CAS-SCF wavefunction of CI3. In parenthesis, mean occupation numbers of the state average orbitals.

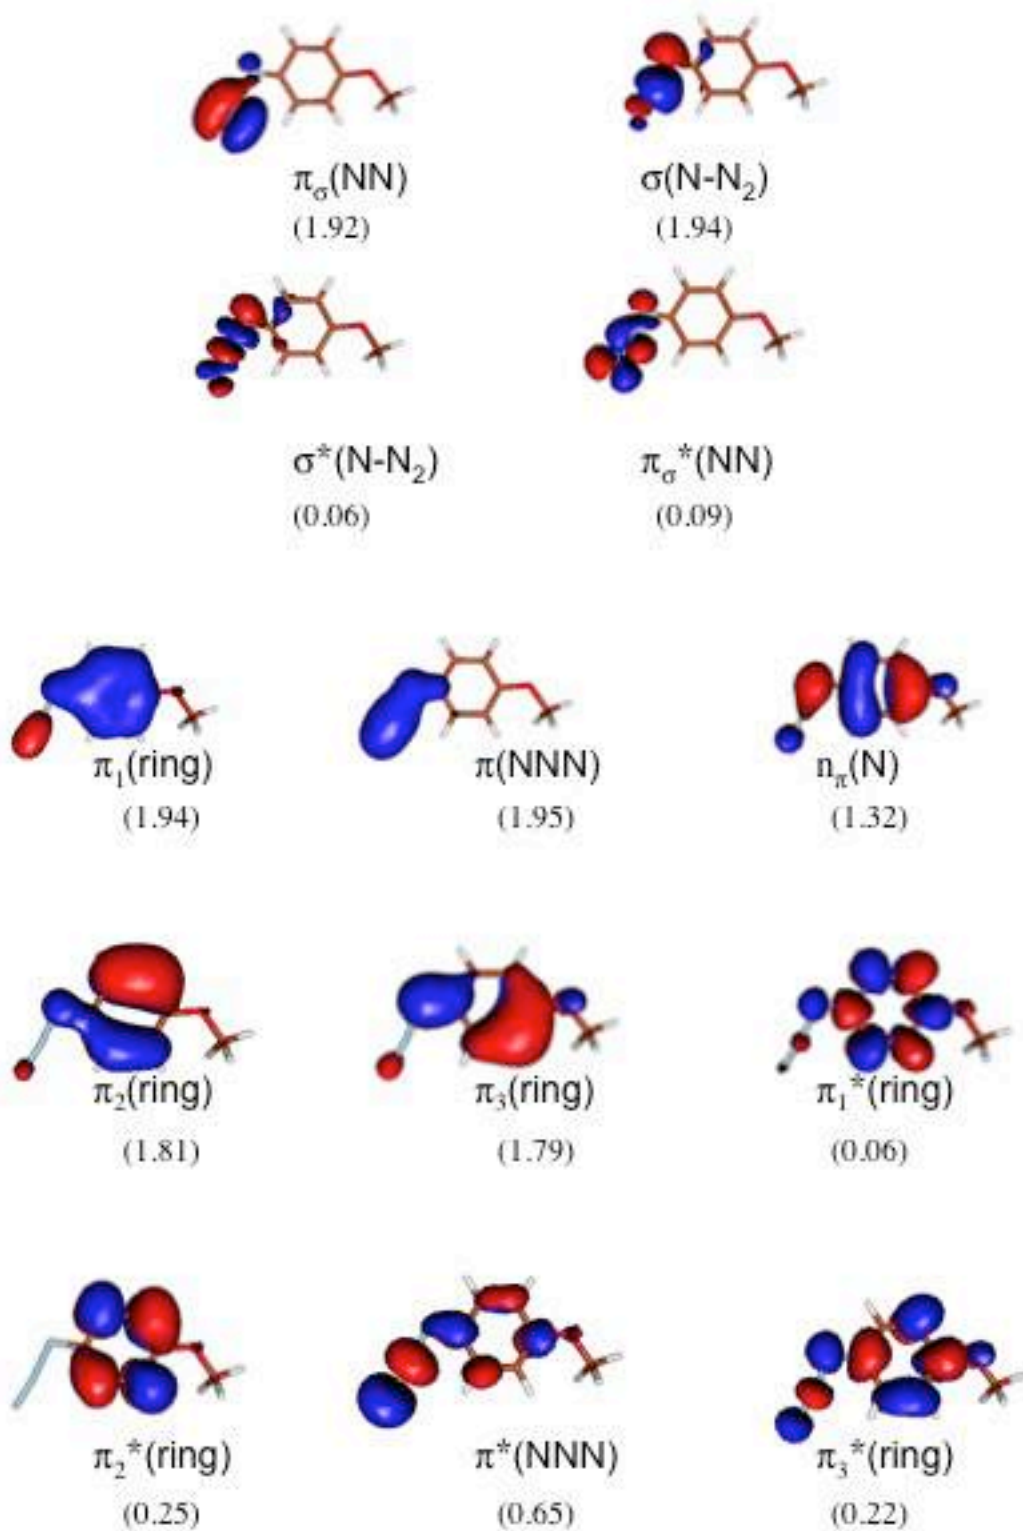

**Figure S9.** Active orbitals included in the CAS-SCF wavefunction of ISC1. In parenthesis, mean occupation numbers of the state average orbitals.

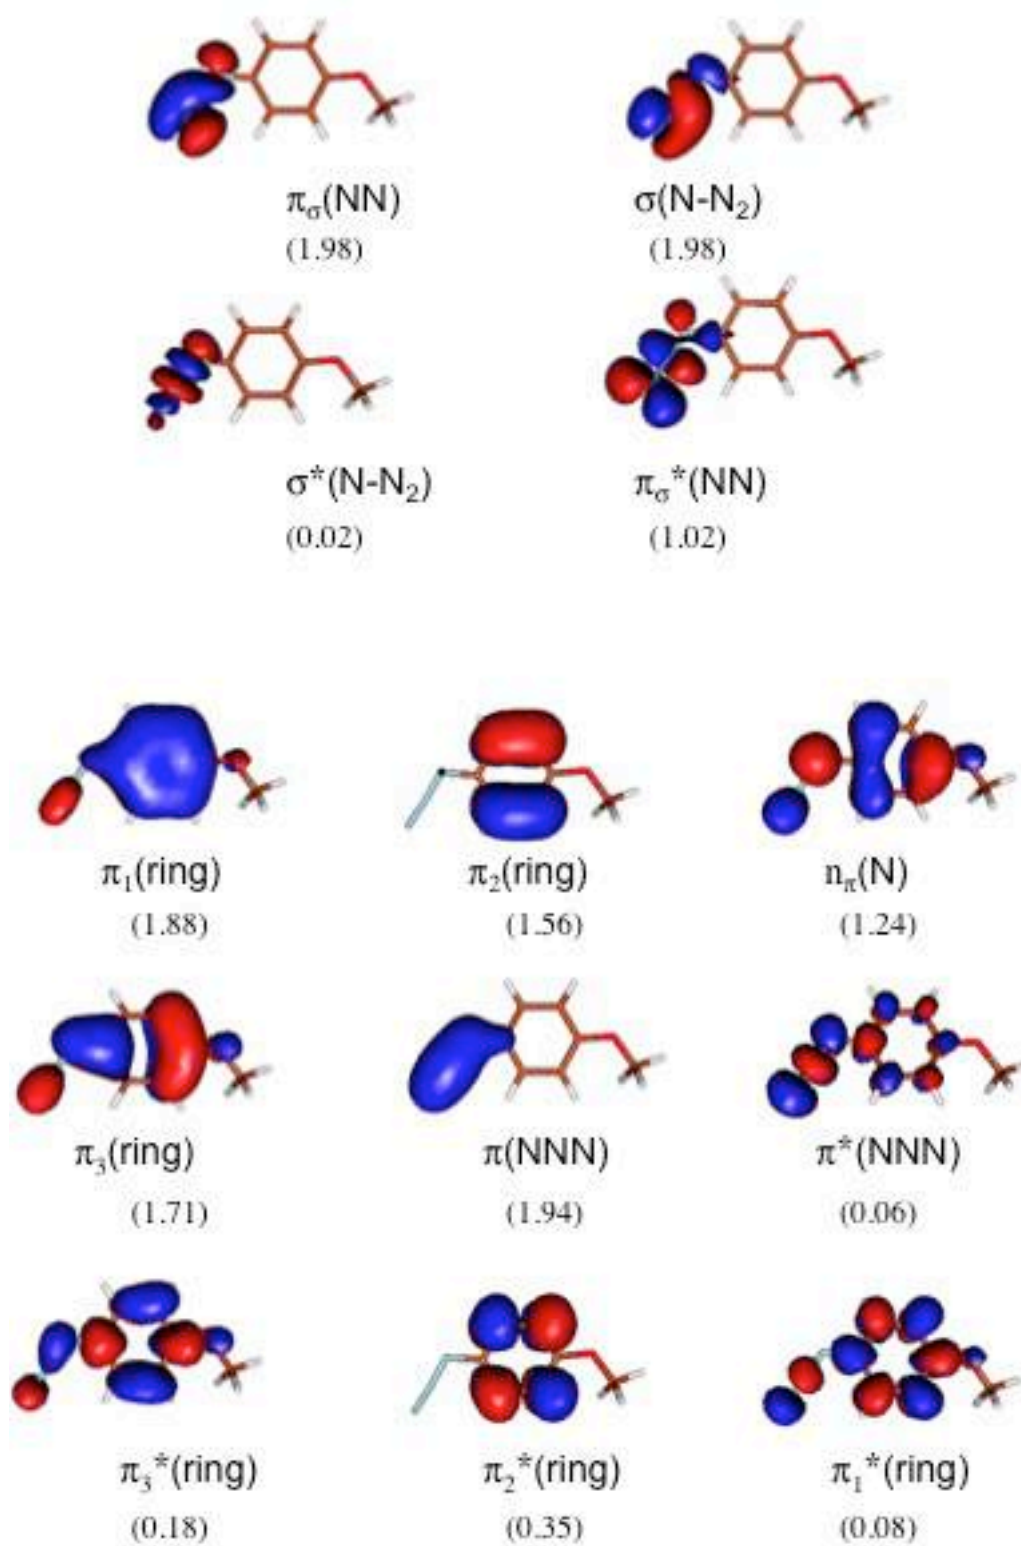

**Figure S10.** Active orbitals included in the CAS-SCF wavefunction of ISC2. In parenthesis, mean occupation numbers of the state average orbitals.

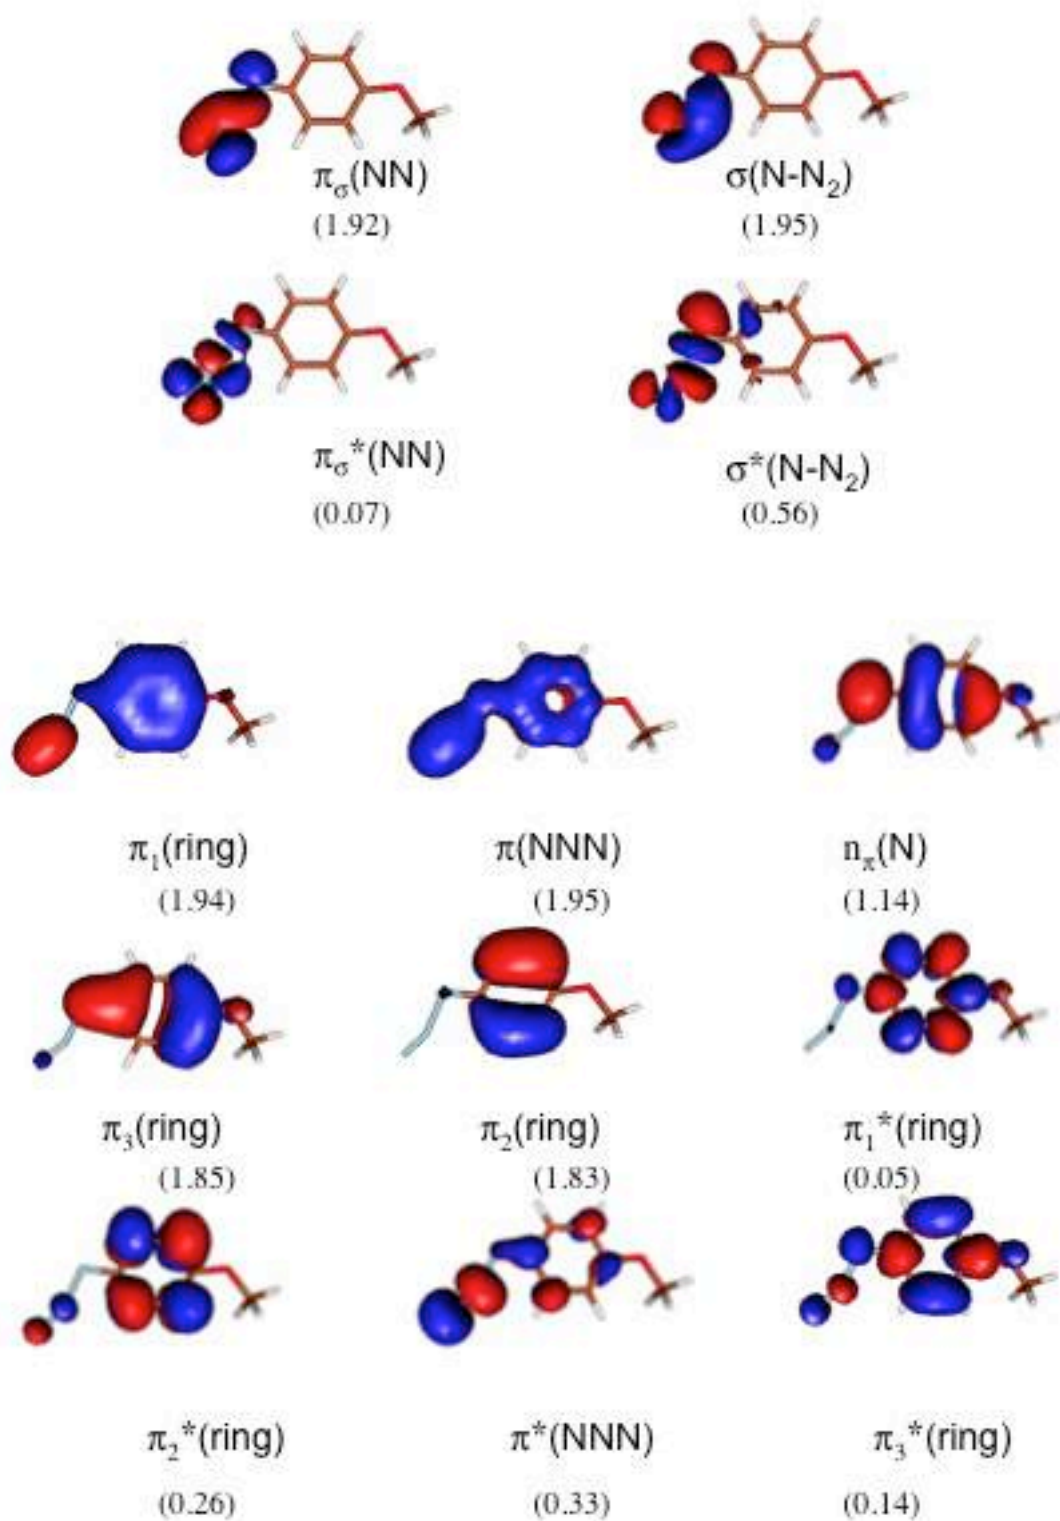

**Figure S11.** Active orbitals included in the CAS-SCF wavefunction of ISC3. In parenthesis, mean occupation numbers of the state average orbitals.

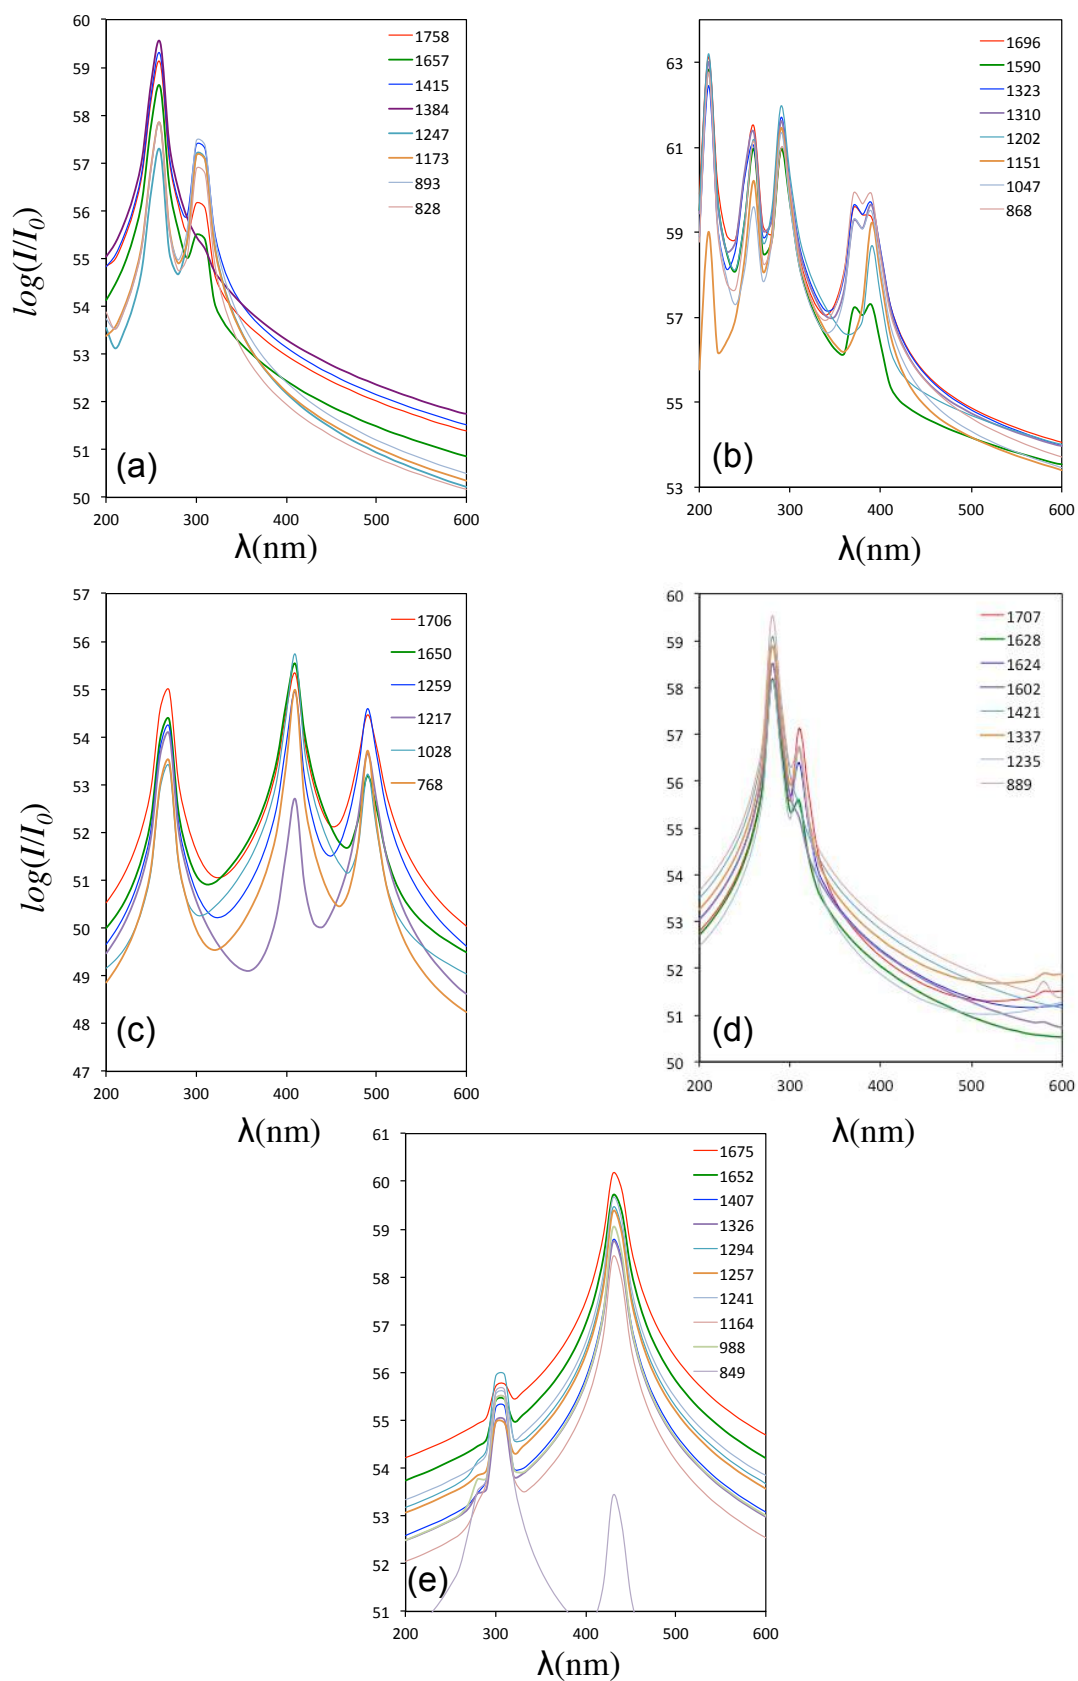

**Figure S12.** Multi-state Raman excitation profiles of (a) 4-methoxyphenyl azide; (b) triplet 4-methoxyphenyl nitrene; (c)  $1^1A''$  4-methoxyphenyl nitrene; (d)  $1^1A'$  4-methoxyphenyl nitrene; (e) 4,4'-dimethoxyazobenzene.

**CAS-SCF Cartesian Coordinates in Ångstroms of the Critical Points on the Potential Energy Surfaces of *p*-Methoxyphenyl Azide:**

**M1** ( $S_0$  Ground State Minimum,  $1^1A'$ )

|     |           |            |            |
|-----|-----------|------------|------------|
| N1  | 2.496888  | 0.000000   | 0.8149510  |
| C2  | 1.199553  | 0.000000   | 0.2409398  |
| C3  | 1.152921  | 0.000000   | -1.1568965 |
| C4  | 0.013275  | 0.000000   | 0.9544298  |
| C5  | -0.059220 | 0.000000   | -1.8147732 |
| C6  | -1.218257 | 0.000000   | 0.2891129  |
| C7  | -1.258469 | 0.000000   | -1.0944310 |
| O8  | -2.389936 | 0.000000   | -1.8340958 |
| C9  | -3.630787 | 0.000000   | -1.1977521 |
| H10 | 2.072194  | 0.000000   | -1.7076011 |
| H11 | 0.014276  | 0.000000   | 2.0272770  |
| H12 | -0.101289 | 0.000000   | -2.8856678 |
| H13 | -2.115369 | 0.000000   | 0.8720036  |
| H14 | -4.375124 | 0.000000   | -1.9779406 |
| H15 | -3.763854 | 0.8841296  | -0.5839424 |
| H16 | -3.763854 | -0.8841296 | -0.5839424 |
| N17 | 2.532838  | 0.000000   | 2.0449088  |
| N18 | 2.658747  | 0.000000   | 3.1652800  |

**M2** ( $S_2$  Excited State Minimum,  $2^1A'$ )

|     |           |           |           |
|-----|-----------|-----------|-----------|
| N1  | 2.485976  | 0.000000  | 0.814358  |
| C2  | 1.217158  | 0.000000  | 0.244241  |
| C3  | 1.192731  | 0.000000  | -1.180046 |
| C4  | 0.004198  | 0.000000  | 1.004959  |
| C5  | -0.062189 | 0.000000  | -1.860509 |
| C6  | -1.245474 | 0.000000  | 0.321636  |
| C7  | -1.263230 | 0.000000  | -1.105009 |
| O8  | -2.394033 | 0.000000  | -1.829533 |
| C9  | -3.643499 | 0.000000  | -1.203817 |
| H10 | 2.118182  | 0.000000  | -1.715010 |
| H11 | 0.022567  | 0.000000  | 2.074550  |
| H12 | -0.119245 | 0.000000  | -2.927883 |
| H13 | -2.151363 | 0.000000  | 0.886372  |
| H14 | -4.377579 | 0.000000  | -1.993531 |
| H15 | -3.782428 | 0.884491  | -0.593575 |
| H16 | -3.782428 | -0.884491 | -0.593575 |
| N17 | 2.534456  | 0.000000  | 2.051281  |
| N18 | 2.692161  | 0.000000  | 3.167318  |

| <b>ISC1</b> (Intersystem Crossing Minimum, $2^1A'/2^3A''$ ) |           |           |           |
|-------------------------------------------------------------|-----------|-----------|-----------|
| N1                                                          | 0.109002  | 0.000000  | 0.052497  |
| C2                                                          | 0.012060  | 0.000000  | 1.348920  |
| C3                                                          | 1.284522  | 0.000000  | 2.047777  |
| C4                                                          | -1.181582 | 0.000000  | 2.141092  |
| C5                                                          | 1.327598  | 0.000000  | 3.405038  |
| C6                                                          | -1.098002 | 0.000000  | 3.529753  |
| C7                                                          | 0.133753  | 0.000000  | 4.176952  |
| O8                                                          | 0.313413  | 0.000000  | 5.507602  |
| C9                                                          | -0.794456 | 0.000000  | 6.360949  |
| H10                                                         | 2.181675  | 0.000000  | 1.462781  |
| H11                                                         | -2.135683 | 0.000000  | 1.665000  |
| H12                                                         | 2.265821  | 0.000000  | 3.922913  |
| H13                                                         | -2.008950 | 0.000000  | 4.091081  |
| H14                                                         | -0.404222 | 0.000000  | 7.365501  |
| H15                                                         | -1.403541 | -0.884744 | 6.217023  |
| N17                                                         | -1.379205 | 0.000000  | -0.517833 |
| N18                                                         | -2.389649 | 0.000000  | -1.087849 |

| <b>ISC2</b> (Intersystem Crossing Minimum, $2^1A'/1^3A''$ ) |           |           |           |
|-------------------------------------------------------------|-----------|-----------|-----------|
| N1                                                          | -0.046870 | 0.000000  | -0.035160 |
| C2                                                          | -0.067425 | 0.000000  | 1.370368  |
| C3                                                          | 1.230934  | 0.000000  | 1.981305  |
| C4                                                          | -1.262484 | 0.000000  | 2.150627  |
| C5                                                          | 1.327482  | 0.000000  | 3.419856  |
| C6                                                          | -1.161130 | 0.000000  | 3.582635  |
| C7                                                          | 0.143862  | 0.000000  | 4.195100  |
| O8                                                          | 0.323997  | 0.000000  | 5.525975  |
| C9                                                          | -0.766944 | 0.000000  | 6.399173  |
| H10                                                         | 2.100348  | 0.000000  | 1.360804  |
| H11                                                         | -2.229192 | 0.000000  | 1.693046  |
| H12                                                         | 2.274838  | 0.000000  | 3.914401  |
| H13                                                         | -2.050271 | 0.000000  | 4.172201  |
| H14                                                         | -0.356085 | 0.000000  | 7.396097  |
| H15                                                         | -1.379320 | -0.884620 | 6.271566  |
| H16                                                         | -1.379320 | +0.884620 | 6.271566  |
| N17                                                         | -1.160736 | 0.000000  | -0.590386 |
| N18                                                         | -2.107511 | 0.000000  | -1.156899 |

| <b>ISC3</b> (Intersystem Crossing Minimum, $1^1A'/1^3A''$ ) |           |           |           |
|-------------------------------------------------------------|-----------|-----------|-----------|
| N1                                                          | 0.044289  | 0.000000  | -0.004226 |
| C2                                                          | -0.061996 | 0.000000  | 1.392499  |
| C3                                                          | 1.193011  | 0.000000  | 2.033153  |
| C4                                                          | -1.201802 | 0.000000  | 2.181997  |
| C5                                                          | 1.281888  | 0.000000  | 3.409457  |
| C6                                                          | -1.108348 | 0.000000  | 3.580825  |
| C7                                                          | 0.127923  | 0.000000  | 4.200130  |
| O8                                                          | 0.327710  | 0.000000  | 5.540643  |
| C9                                                          | -0.771167 | 0.000000  | 6.396531  |
| H10                                                         | 2.086664  | 0.000000  | 1.439973  |
| H11                                                         | -2.177959 | 0.000000  | 1.741203  |
| H12                                                         | 2.239238  | 0.000000  | 3.891562  |
| H13                                                         | -2.015064 | 0.000000  | 4.149162  |
| H14                                                         | -0.378956 | 0.000000  | 7.401291  |
| H15                                                         | -1.385010 | -0.883882 | 6.258838  |
| N17                                                         | -1.557602 | 0.000000  | -0.640866 |
| N18                                                         | -2.319412 | 0.000000  | -1.427699 |

**CI1** (Conical Intersection,  $2^1A''/2^1A'$ )

|     |           |           |           |
|-----|-----------|-----------|-----------|
| N1  | 0.116642  | -0.000004 | 0.053027  |
| C2  | 0.015401  | -0.000001 | 1.352259  |
| C3  | 1.290426  | -0.000000 | 2.049433  |
| C4  | -1.179689 | 0.000001  | 2.146523  |
| C5  | 1.332594  | 0.000001  | 3.407092  |
| C6  | -1.100892 | 0.000001  | 3.533843  |
| C7  | 0.133552  | 0.000001  | 4.178755  |
| O8  | 0.316580  | 0.000002  | 5.511524  |
| C9  | -0.794522 | -0.000001 | 6.366161  |
| H10 | 2.188600  | -0.000001 | 1.461989  |
| H11 | -2.135456 | 0.000001  | 1.667525  |
| H12 | 2.270576  | 0.000003  | 3.929544  |
| H13 | -2.014355 | 0.000002  | 4.094879  |
| H14 | -0.401895 | -0.000003 | 7.372171  |
| H15 | -1.402697 | -0.887118 | 6.221067  |
| H16 | -1.402699 | 0.887116  | 6.221071  |
| N17 | -1.405592 | -0.000001 | -0.525665 |
| N18 | -2.397561 | 0.000001  | -1.134977 |

**CI2** (Conical Intersection,  $2^3A''/1^3A''$ )

|     |           |           |           |
|-----|-----------|-----------|-----------|
| N1  | 0.089811  | -0.000000 | 0.041534  |
| C2  | 0.005621  | -0.000000 | 1.368872  |
| C3  | 1.269017  | -0.000000 | 2.047899  |
| C4  | -1.178269 | -0.000000 | 2.158988  |
| C5  | 1.326696  | 0.000000  | 3.415014  |
| C6  | -1.100829 | -0.000000 | 3.542028  |
| C7  | 0.141168  | -0.000000 | 4.182612  |
| O8  | 0.317123  | 0.000000  | 5.515214  |
| C9  | -0.795116 | 0.000000  | 6.369625  |
| H10 | 2.163659  | -0.000000 | 1.454914  |
| H11 | -2.135389 | -0.000000 | 1.678503  |
| H12 | 2.268481  | 0.000000  | 3.930343  |
| H13 | -2.011586 | -0.000000 | 4.107093  |
| H14 | -0.401842 | 0.000000  | 7.375312  |
| H15 | -1.402982 | -0.887189 | 6.225049  |
| H16 | -1.402982 | 0.887189  | 6.225049  |
| N17 | -1.328901 | 0.000000  | -0.586309 |
| N18 | -2.389034 | 0.000000  | -1.075055 |

**CI3** ( $S_1/S_0$  Conical Intersection,  $1^1A''/1^1A'$ )

|     |           |           |           |
|-----|-----------|-----------|-----------|
| N1  | 0.113242  | 0.000015  | -0.013592 |
| C2  | -0.042387 | 0.000009  | 1.399568  |
| C3  | 1.209017  | 0.000003  | 2.041134  |
| C4  | -1.182885 | 0.000010  | 2.157863  |
| C5  | 1.281966  | -0.000007 | 3.420365  |
| C6  | -1.105073 | 0.000006  | 3.567969  |
| C7  | 0.119094  | -0.000005 | 4.197188  |
| O8  | 0.310075  | -0.000006 | 5.543704  |
| C9  | -0.801670 | -0.000002 | 6.387192  |
| H10 | 2.113654  | 0.000006  | 1.459881  |
| H11 | -2.154019 | 0.000017  | 1.703528  |
| H12 | 2.236427  | -0.000015 | 3.912663  |
| H13 | -2.021542 | 0.000009  | 4.124500  |
| H14 | -0.419725 | -0.000001 | 7.398303  |
| H15 | -1.413290 | -0.886111 | 6.240766  |
| H16 | -1.413284 | 0.886111  | 6.240763  |
| N17 | -1.740350 | 0.000002  | -0.759781 |
| N18 | -2.598489 | -0.000040 | -1.436976 |



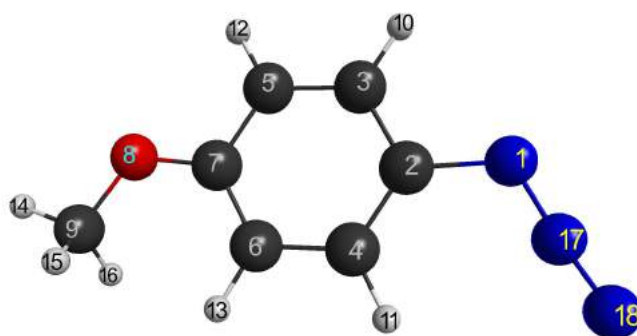

**Table S1.** CAS-SCF internal coordinates of 4-methoxyphenyl azide.<sup>a</sup>

| <i>Coor.</i>        | <b>M1<sup>b</sup></b> | <b>M2<sup>b</sup></b> | <b>CI1<sup>c</sup></b> | <b>CI2<sup>c</sup></b> | <b>CI3<sup>c</sup></b> | <b>ISC1<sup>b</sup></b> | <b>ISC2<sup>b</sup></b> | <b>ISC3<sup>b</sup></b> |
|---------------------|-----------------------|-----------------------|------------------------|------------------------|------------------------|-------------------------|-------------------------|-------------------------|
| R <sub>1,2</sub>    | 1.419                 | 1.391                 | 1.303                  | 1.334                  | 1.422                  | 1.300                   | 1.406                   | 1.401                   |
| R <sub>3,2</sub>    | 1.399                 | 1.424                 | 1.453                  | 1.429                  | 1.406                  | 1.452                   | 1.435                   | 1.409                   |
| R <sub>4,2</sub>    | 1.384                 | 1.432                 | 1.435                  | 1.423                  | 1.370                  | 1.433                   | 1.427                   | 1.387                   |
| R <sub>5,3</sub>    | 1.379                 | 1.428                 | 1.358                  | 1.371                  | 1.381                  | 1.358                   | 1.442                   | 1.379                   |
| R <sub>6,4</sub>    | 1.400                 | 1.424                 | 1.390                  | 1.387                  | 1.412                  | 1.391                   | 1.436                   | 1.402                   |
| R <sub>7,5</sub>    | 1.399                 | 1.419                 | 1.426                  | 1.412                  | 1.398                  | 1.422                   | 1.415                   | 1.399                   |
| R <sub>8,7</sub>    | 1.352                 | 1.343                 | 1.345                  | 1.344                  | 1.360                  | 1.343                   | 1.343                   | 1.355                   |
| R <sub>9,8</sub>    | 1.395                 | 1.397                 | 1.402                  | 1.402                  | 1.396                  | 1.398                   | 1.397                   | 1.393                   |
| R <sub>10,3</sub>   | 1.072                 | 1.069                 | 1.073                  | 1.073                  | 1.075                  | 1.071                   | 1.068                   | 1.073                   |
| R <sub>11,4</sub>   | 1.073                 | 1.070                 | 1.069                  | 1.071                  | 1.072                  | 1.066                   | 1.070                   | 1.071                   |
| R <sub>12,5</sub>   | 1.072                 | 1.069                 | 1.074                  | 1.073                  | 1.074                  | 1.072                   | 1.069                   | 1.072                   |
| R <sub>13,6</sub>   | 1.070                 | 1.068                 | 1.072                  | 1.072                  | 1.072                  | 1.070                   | 1.067                   | 1.070                   |
| R <sub>14,9</sub>   | 1.078                 | 1.078                 | 1.080                  | 1.080                  | 1.081                  | 1.078                   | 1.078                   | 1.079                   |
| R <sub>15,9</sub>   | 1.085                 | 1.084                 | 1.085                  | 1.085                  | 1.087                  | 1.084                   | 1.083                   | 1.085                   |
| R <sub>16,9</sub>   | 1.085                 | 1.084                 | 1.085                  | 1.085                  | 1.087                  | 1.084                   | 1.083                   | 1.085                   |
| R <sub>17,1</sub>   | 1.230                 | 1.238                 | 1.629                  | 1.558                  | 1.998                  | 1.594                   | 1.245                   | 1.724                   |
| R <sub>18,17</sub>  | 1.127                 | 1.127                 | 1.164                  | 1.171                  | 1.093                  | 1.160                   | 1.103                   | 1.095                   |
| A <sub>3,2,1</sub>  | 115.778               | 115.178               | 114.214                | 114.638                | 110.859                | 114.500                 | 114.361                 | 112.692                 |
| A <sub>4,2,1</sub>  | 125.108               | 123.710               | 128.064                | 127.256                | 129.904                | 127.847                 | 123.979                 | 129.060                 |
| A <sub>5,3,2</sub>  | 120.401               | 119.451               | 120.449                | 120.693                | 120.171                | 120.594                 | 119.039                 | 120.738                 |
| A <sub>6,4,2</sub>  | 120.596               | 119.236               | 120.357                | 120.470                | 120.461                | 120.126                 | 119.092                 | 120.887                 |
| A <sub>7,5,4</sub>  | 60.508                | 59.156                | 59.410                 | 59.593                 | 60.865                 | 59.622                  | 59.331                  | 60.717                  |
| A <sub>8,7,5</sub>  | 115.835               | 115.180               | 114.944                | 115.372                | 115.671                | 115.196                 | 115.516                 | 115.941                 |
| A <sub>9,8,7</sub>  | 119.676               | 120.751               | 119.747                | 119.968                | 119.115                | 119.916                 | 120.966                 | 119.437                 |
| A <sub>10,3,2</sub> | 119.014               | 119.048               | 118.144                | 118.293                | 120.135                | 118.117                 | 119.285                 | 119.382                 |
| A <sub>11,4,2</sub> | 120.971               | 121.110               | 119.773                | 119.700                | 121.309                | 119.910                 | 121.529                 | 120.989                 |

<sup>a</sup>Intenuclear distance in Ångstrom, valence bond and dihedral angles in degrees.

<sup>b</sup>ANO-RCC (C,N,O[4s3p2d1f]/H[3s2p1d]).

<sup>c</sup>ANO-RCC (C,N,O[3s2p1d]/H[2s1p]).

**Table S1.** continuation

| <i>Coor.</i>                  | <b>M1<sup>b</sup></b> | <b>M2<sup>b</sup></b> | <b>CI1<sup>c</sup></b> | <b>CI2<sup>c</sup></b> | <b>CI3<sup>c</sup></b> | <b>ISC1<sup>b</sup></b> | <b>ISC2<sup>b</sup></b> | <b>ISC3<sup>b</sup></b> |
|-------------------------------|-----------------------|-----------------------|------------------------|------------------------|------------------------|-------------------------|-------------------------|-------------------------|
| <i>A</i> <sub>12,5,7</sub>    | 118.742               | 119.112               | 118.118                | 118.443                | 118.972                | 118.217                 | 119.210                 | 118.853                 |
| <i>A</i> <sub>13,6,7</sub>    | 121.349               | 121.227               | 120.858                | 120.930                | 121.528                | 120.640                 | 121.311                 | 121.312                 |
| <i>A</i> <sub>14,9,8</sub>    | 106.503               | 106.308               | 106.247                | 106.178                | 106.494                | 106.376                 | 106.276                 | 106.591                 |
| <i>A</i> <sub>15,9,8</sub>    | 111.558               | 111.521               | 111.264                | 111.292                | 111.529                | 111.359                 | 111.572                 | 111.617                 |
| <i>A</i> <sub>16,9,8</sub>    | 111.558               | 111.521               | 111.264                | 111.292                | 111.528                | 111.359                 | 111.572                 | 111.617                 |
| <i>A</i> <sub>17,1,2</sub>    | 115.541               | 116.440               | 106.359                | 110.317                | 105.643                | 106.692                 | 115.657                 | 107.323                 |
| <i>A</i> <sub>18,17,1</sub>   | 175.262               | 174.201               | 169.255                | 179.138                | 163.649                | 171.540                 | 175.600                 | 155.749                 |
| <i>D</i> <sub>4,2,1,3</sub>   | 180.000               | 180.000               | 180.000                | -180.000               | 180.000                | 180.000                 | 180.000                 | 180.000                 |
| <i>D</i> <sub>5,3,2,4</sub>   | 0.000                 | 0.000                 | 0.000                  | 0.000                  | 0.000                  | 0.000                   | 0.000                   | 0.000                   |
| <i>D</i> <sub>6,4,2,3</sub>   | 0.000                 | 0.000                 | 0.000                  | 0.000                  | 0.000                  | 0.000                   | 0.000                   | 0.000                   |
| <i>D</i> <sub>7,5,4,2</sub>   | 180.000               | 180.000               | 180.000                | 180.000                | 180.000                | 180.000                 | 180.000                 | 180.000                 |
| <i>D</i> <sub>8,7,5,6</sub>   | 180.000               | 180.000               | 180.000                | 180.000                | 180.000                | 180.000                 | 180.000                 | 180.000                 |
| <i>D</i> <sub>9,8,7,6</sub>   | 0.000                 | 0.000                 | 0.000                  | 0.000                  | 0.000                  | 0.000                   | 0.000                   | 0.000                   |
| <i>D</i> <sub>10,3,2,5</sub>  | 180.000               | 180.000               | 180.000                | -180.000               | 180.000                | 180.000                 | 180.000                 | 180.000                 |
| <i>D</i> <sub>11,4,2,6</sub>  | 180.000               | 180.000               | 180.000                | 180.000                | 180.000                | 180.000                 | 180.000                 | 180.000                 |
| <i>D</i> <sub>12,5,7,3</sub>  | 180.000               | 180.000               | 180.000                | -180.000               | 180.000                | 180.000                 | 180.000                 | 180.000                 |
| <i>D</i> <sub>13,6,7,4</sub>  | 180.000               | 180.000               | 180.000                | 180.000                | 180.000                | 180.000                 | 180.000                 | 180.000                 |
| <i>D</i> <sub>14,9,8,7</sub>  | 180.000               | 180.000               | 180.000                | 180.000                | -                      | 180.000                 | 180.000                 | 180.000                 |
| <i>D</i> <sub>15,9,8,14</sub> | -118.770              | -118.660              | -118.706               | -118.661               | 180.000                | -                       | -118.766                | -118.599                |
| <i>D</i> <sub>16,9,8,14</sub> | 118.770               | 118.660               | 118.706                | 118.661                | 118.760                | 118.766                 | 118.599                 | 118.795                 |
| <i>D</i> <sub>17,1,2,3</sub>  | 180.000               | 180.000               | 180.000                | 180.000                | 179.999                | 180.000                 | 180.000                 | 180.000                 |
| <i>D</i> <sub>18,17,1,2</sub> | 180.000               | 180.000               | 180.000                | 179.995                | -                      | 180.000                 | 180.000                 | 180.000                 |

<sup>a</sup>Intenuclear distance in Ångstrom, valence bond and dihedral angles in degrees.

<sup>b</sup>ANO-RCC (C,N,O[4s3p2d1f]/H[3s2p1d]).

<sup>c</sup>ANO-RCC (C,N,O[3s2p1d]/H[2s1p]).

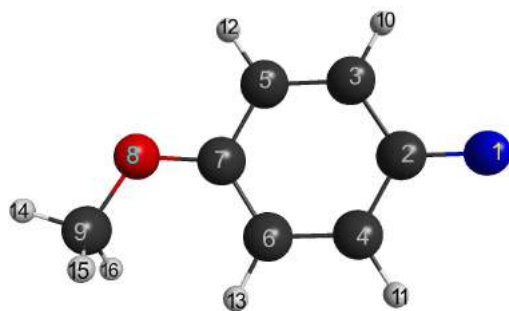

**Table S2.** CAS-SCF internal coordinates of 4-methoxyphenyl nitrene.<sup>a</sup>

| <i>Coord.</i>       | $1^3A''^b$ | $1^1A''^b$ | $1^1A'^b$ | $2^1A'$ | $2^1A'/2^3A''$ | $4^1A/3^1A$ |
|---------------------|------------|------------|-----------|---------|----------------|-------------|
| R <sub>1,2</sub>    | 1.345      | 1.290      | 1.346     | 1.388   | 1.337          | 1.330       |
| R <sub>3,2</sub>    | 1.428      | 1.469      | 1.426     | 1.406   | 1.421          | 1.433       |
| R <sub>4,2</sub>    | 1.419      | 1.468      | 1.417     | 1.393   | 1.436          | 1.437       |
| R <sub>5,3</sub>    | 1.371      | 1.354      | 1.370     | 1.382   | 1.410          | 1.419       |
| R <sub>6,4</sub>    | 1.386      | 1.368      | 1.381     | 1.396   | 1.410          | 1.417       |
| R <sub>7,5</sub>    | 1.409      | 1.430      | 1.407     | 1.396   | 1.400          | 1.393       |
| R <sub>8,7</sub>    | 1.347      | 1.344      | 1.330     | 1.355   | 1.353          | 1.354       |
| R <sub>9,8</sub>    | 1.397      | 1.398      | 1.403     | 1.394   | 1.394          | 1.394       |
| R <sub>10,3</sub>   | 1.072      | 1.071      | 1.072     | 1.072   | 1.070          | 1.070       |
| R <sub>11,4</sub>   | 1.072      | 1.071      | 1.072     | 1.072   | 1.070          | 1.070       |
| R <sub>12,5</sub>   | 1.072      | 1.072      | 1.072     | 1.072   | 1.071          | 1.071       |
| R <sub>13,6</sub>   | 1.070      | 1.070      | 1.069     | 1.070   | 1.070          | 1.069       |
| R <sub>14,9</sub>   | 1.078      | 1.078      | 1.077     | 1.078   | 1.078          | 1.078       |
| R <sub>15,9</sub>   | 1.084      | 1.084      | 1.083     | 1.085   | 1.085          | 1.085       |
| R <sub>16,9</sub>   | 1.084      | 1.084      | 1.083     | 1.085   | 1.085          | 1.085       |
| A <sub>3,2,1</sub>  | 120.818    | 121.399    | 121.708   | 119.600 | 120.796        | 121.044     |
| A <sub>4,2,1</sub>  | 120.835    | 121.483    | 120.930   | 120.788 | 120.806        | 120.869     |
| A <sub>5,3,2</sub>  | 120.207    | 120.221    | 121.242   | 119.581 | 119.876        | 119.811     |
| A <sub>6,4,2</sub>  | 120.709    | 120.726    | 121.898   | 120.002 | 120.082        | 120.201     |
| A <sub>7,5,4</sub>  | 59.627     | 58.789     | 59.141    | 60.672  | 60.131         | 60.250      |
| A <sub>8,7,5</sub>  | 115.431    | 115.096    | 115.226   | 115.898 | 115.533        | 115.733     |
| A <sub>9,8,7</sub>  | 120.016    | 120.125    | 120.943   | 119.562 | 119.747        | 119.862     |
| A <sub>10,3,2</sub> | 119.023    | 118.271    | 117.599   | 120.287 | 119.773        | 119.736     |
| A <sub>11,4,2</sub> | 119.023    | 118.217    | 117.398   | 120.358 | 119.646        | 119.603     |
| A <sub>12,5,7</sub> | 118.274    | 117.671    | 118.199   | 118.789 | 118.876        | 118.947     |
| A <sub>13,6,7</sub> | 120.925    | 120.436    | 120.905   | 121.251 | 121.165        | 121.174     |
| A <sub>14,9,8</sub> | 106.394    | 106.390    | 106.069   | 106.543 | 106.486        | 106.466     |

continue

**Table S2.** Continuation

| <i>Coord.</i>   | $1^3A''^b$ | $1^1A''^b$ | $1^1A'^b$ | $2^1A'$  | $2^1A'/2^3A''$ | $4^1A/3^1A$ |
|-----------------|------------|------------|-----------|----------|----------------|-------------|
| $A_{15,9,8}$    | 111.496    | 111.449    | 111.229   | 111.607  | 111.590        | 111.627     |
| $A_{16,9,8}$    | 111.496    | 111.449    | 111.229   | 111.607  | 111.590        | 111.627     |
| $D_{4,2,1,3}$   | 180.000    | 180.000    | 180.000   | 180.000  | 180.000        | 180.000     |
| $D_{5,3,2,4}$   | 0.000      | 0.000      | 0.000     | 0.000    | 0.000          | 0.000       |
| $D_{6,4,2,3}$   | 0.000      | 0.000      | 0.000     | 0.000    | 0.000          | 0.000       |
| $D_{7,5,4,2}$   | 180.000    | 180.000    | 180.000   | 180.000  | 180.000        | 180.000     |
| $D_{8,7,5,6}$   | 180.000    | 180.000    | 180.000   | 180.000  | 180.000        | 180.000     |
| $D_{9,8,7,6}$   | 0.000      | 0.000      | 0.000     | 0.000    | 0.000          | 180.000     |
| $D_{10,3,2,5}$  | 180.000    | 180.000    | 180.000   | 180.000  | 180.000        | 0.000       |
| $D_{11,4,2,6}$  | 180.000    | 180.000    | 180.000   | 180.000  | 180.000        | 180.000     |
| $D_{12,5,7,3}$  | 180.000    | 180.000    | 180.000   | 180.000  | 180.000        | 180.000     |
| $D_{13,6,7,4}$  | 180.000    | 180.000    | 180.000   | 180.000  | 180.000        | 180.000     |
| $D_{14,9,8,7}$  | 180.000    | 180.000    | 180.000   | 180.000  | 180.000        | 180.000     |
| $D_{15,9,8,14}$ | -118.721   | -118.727   | -118.683  | -118.769 | -118.741       | -118.707    |
| $D_{16,9,8,14}$ | 118.721    | 118.727    | 118.683   | 118.769  | 118.741        | 118.707     |

<sup>a</sup>Intenuclear distance in Ångstrom, valence bond and dihedral angles in degrees.<sup>b</sup>ANO-RCC (C,N,O[4s3p2d1f]/H[3s2p1d]).

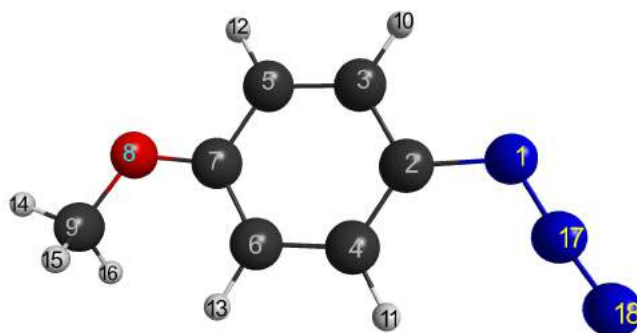

**Table S3.** Definition of redundant internal coordinates of 4,4'-dimethoxyazobenzene.

| $N^{\circ}$ | <i>Coord.</i> | <i>Connectivity</i> | <i>type</i>                        |
|-------------|---------------|---------------------|------------------------------------|
| 1           | $r_1$         | 9-14                | $\nu(\text{C-H})_{\text{methyl}}$  |
| 2           | $r_2$         | 9-15                | $\nu(\text{C-H})_{\text{methyl}}$  |
| 3           | $r_3$         | 9-16                | $\nu(\text{C-H})_{\text{methyl}}$  |
| 4           | $r_4$         | 3-10                | $\nu(\text{C-H})_{\text{ring}}$    |
| 5           | $r_5$         | 4-11                | $\nu(\text{C-H})_{\text{ring}}$    |
| 6           | $r_6$         | 5-12                | $\nu(\text{C-H})_{\text{ring}}$    |
| 7           | $r_7$         | 6-13                | $\nu(\text{C-H})_{\text{ring}}$    |
| 8           | $r_8$         | 7-8                 | $\nu(\text{C-O})$                  |
| 9           | $r_9$         | 8-9                 | $\nu(\text{O-CH}_3)$               |
| 10          | $r_{10}$      | 2-1                 | $\nu(\text{N-C}_{\text{ring}})$    |
| 11          | $r_{11}$      | 1-17                | $\nu(\text{N-N})$                  |
| 12          | $r_{12}$      | 17-18               | $\nu(\text{N-N})$                  |
| 13          | $R_1$         | 2-3                 | $\nu(\text{C-C})$                  |
| 14          | $R_2$         | 3-5                 | $\nu(\text{C-C})$                  |
| 15          | $R_3$         | 5-7                 | $\nu(\text{C-C})$                  |
| 16          | $R_4$         | 7-6                 | $\nu(\text{C-C})$                  |
| 17          | $R_5$         | 4-2                 | $\nu(\text{C-C})$                  |
| 18          | $R_6$         | 6-4                 | $\nu(\text{C-C})$                  |
| 19          | $\beta_1$     | [10-3-2]-[10-3-5]   | $\delta(\text{C-H})_{\text{ring}}$ |
| 20          | $\beta_2$     | [12-5-7]-[12-5-3]   | $\delta(\text{C-H})_{\text{ring}}$ |
| 21          | $\beta_3$     | [13-6-7]-[13-6-4]   | $\delta(\text{C-H})_{\text{ring}}$ |
| 22          | $\beta_4$     | [11-4-2]-[11-4-6]   | $\delta(\text{C-H})_{\text{ring}}$ |
| 23          | $\beta_5$     | [8-7-5]-[8-7-6]     | $\delta(\text{O-C-C})$             |
| 24          | $\beta_6$     | [1-2-3]-[1-2-4]     | $\delta(\text{N-C-C})$             |

Continue

**Table S3.** Continuation

---

|    |               |                    |                                        |
|----|---------------|--------------------|----------------------------------------|
| 25 | $\beta_7$     | 9-8-7              | $\delta(\text{C-O-C})$                 |
| 26 | $\beta_8$     | 2-1-17             | $\delta(\text{C-N-N})$                 |
| 27 | $\beta_9$     | 1-17-18            | $\delta(\text{N-N-N})$                 |
| 28 | $\alpha_1$    | 15-9-16            | $\delta(\text{H-C-H})_{\text{methyl}}$ |
| 29 | $\alpha_2$    | 14-9-16            | $\delta(\text{H-C-H})_{\text{methyl}}$ |
| 30 | $\alpha_3$    | 14-9-15            | $\delta(\text{H-C-H})_{\text{methyl}}$ |
| 31 | $\alpha'_1$   | 14-9-8             | $\delta(\text{O-C-H})_{\text{methyl}}$ |
| 32 | $\alpha'_2$   | 15-9-8             | $\delta(\text{O-C-H})_{\text{methyl}}$ |
| 33 | $\alpha'_3$   | 16-9-8             | $\delta(\text{O-C-H})_{\text{methyl}}$ |
| 34 | $\alpha_4$    | 5-7-6              | $\delta(\text{C-C-C})_{\text{ring}}$   |
| 35 | $\alpha_5$    | 7-6-4              | $\delta(\text{C-C-C})_{\text{ring}}$   |
| 36 | $\alpha_6$    | 6-4-2              | $\delta(\text{C-C-C})_{\text{ring}}$   |
| 37 | $\alpha_7$    | 4-2-3              | $\delta(\text{C-C-C})_{\text{ring}}$   |
| 38 | $\alpha_8$    | 2-3-5              | $\delta(\text{C-C-C})_{\text{ring}}$   |
| 39 | $\alpha_9$    | 3-5-7              | $\delta(\text{C-C-C})_{\text{ring}}$   |
| 40 | $\gamma_1$    | 13-6-7-4           | $\gamma(\text{C-H})$                   |
| 41 | $\gamma_2$    | 11-4-6-2           | $\gamma(\text{C-H})$                   |
| 42 | $\gamma_3$    | 10-3-2-5           | $\gamma(\text{C-H})$                   |
| 43 | $\gamma_4$    | 12-5-3-7           | $\gamma(\text{C-H})$                   |
| 44 | $\gamma_5$    | 1-2-4-3            | $\gamma(\text{C-N})$                   |
| 45 | $\gamma_6$    | 8-7-5-6            | $\gamma(\text{O-C})$                   |
| 46 | $\Gamma_1$    | (5,8)-7-6-(4-13)   | $\Gamma(\text{CC})$                    |
| 47 | $\Gamma_2$    | (7,13)-6-4-(11-2)  | $\Gamma(\text{CC})$                    |
| 48 | $\Gamma_3$    | (6,11)-4-2-(3-1)   | $\Gamma(\text{CC})$                    |
| 49 | $\Gamma_4$    | (4,1)-2-3-(5-10)   | $\Gamma(\text{CC})$                    |
| 50 | $\Gamma_5$    | (2,10)-3-5-(7-12)  | $\Gamma(\text{CC})$                    |
| 51 | $\Gamma_6$    | (3,12)-5-7-(6-8)   | $\Gamma(\text{CC})$                    |
| 52 | $\Gamma_7$    | (5,6)-7-8-(9)      | $\Gamma(\text{OC})$                    |
| 53 | $\Gamma_8$    | (14,15,16)-9-8-(7) | $\Gamma(\text{CO})$                    |
| 54 | $\Gamma_9$    | (3,4)-1-2-(17)     | $\Gamma(\text{CN})$                    |
| 55 | $\Gamma_{10}$ | (2)-1-17-(18)      | $\Gamma(\text{NN})$                    |

---

**Table S3b.** Non-redundant internal coordinates of 4-methoxyphenyl nitrene.

| <i>Coordinate</i>     | <i>type</i>                          | <i>Definition</i>                                                                 | Wilson |
|-----------------------|--------------------------------------|-----------------------------------------------------------------------------------|--------|
| $q_1 \dots q_3$       | $\nu(\text{C-H})_{\text{methyl}}$    | $r_1 \dots r_3$                                                                   |        |
| $q_4 \dots q_7$       | $\nu(\text{C-H})_{\text{ring}}$      | $r_4 \dots r_7$                                                                   |        |
| $q_8$                 | $\nu(\text{C-O})$                    | $r_8$                                                                             |        |
| $q_9$                 | $\nu(\text{O-CH}_3)$                 | $r_9$                                                                             |        |
| $q_{10}$              | $\nu(\text{N-C}_{\text{ring}})$      | $r_{10}$                                                                          |        |
| $q_{11}$              | $\nu(\text{N-N})$                    | $r_{11}$                                                                          |        |
| $q_{12}$              | $\nu(\text{N-N})$                    | $r_{12}$                                                                          |        |
| $q_{13}$              | $\nu(\text{C-C})$                    | $6^{-1/2}(\text{R}_1+\text{R}_2+\text{R}_3+\text{R}_4+\text{R}_5+\text{R}_6)$     | 1      |
| $q_{14}$              | $\nu(\text{C-C})$                    | $12^{-1/2}(-\text{R}_1+2\text{R}_2-\text{R}_3-\text{R}_4+2\text{R}_5-\text{R}_6)$ | 8a     |
| $q_{15}$              | $\nu(\text{C-C})$                    | $2^{-1}(-\text{R}_1+\text{R}_3-\text{R}_4+\text{R}_6)$                            | 8b     |
| $q_{16}$              | $\nu(\text{C-C})$                    | $6^{-1/2}(\text{R}_1-\text{R}_2+\text{R}_3-\text{R}_4+\text{R}_5-\text{R}_6)$     | 14     |
| $q_{17}$              | $\nu(\text{C-C})$                    | $2^{-1}(\text{R}_1-\text{R}_3-\text{R}_4+\text{R}_6)$                             | 19a    |
| $q_{18}$              | $\nu(\text{C-C})$                    | $2^{-1/2}(\text{R}_2-\text{R}_6)$                                                 | 19b    |
| $q_{19}$              | $\delta(\text{C-H})_{\text{ring}}$   | $2^{-1}(\beta_1+\beta_2+\beta_3+\beta_4)$                                         | 9a     |
| $q_{20}$              | $\delta(\text{C-H})_{\text{ring}}$   | $2^{-1}(\beta_1+\beta_2-\beta_3-\beta_4)$                                         | 15     |
| $q_{21}$              | $\delta(\text{C-H})_{\text{ring}}$   | $2^{-1}(\beta_1-\beta_2+\beta_3-\beta_4)$                                         | 3      |
| $q_{22}$              | $\delta(\text{C-H})_{\text{ring}}$   | $2^{-1}(\beta_1-\beta_2-\beta_3+\beta_4)$                                         | 18a    |
| $q_{23}$              | $\delta(\text{O-C-C})$               | $\beta_5$                                                                         |        |
| $q_{24}$              | $\delta(\text{N-C-C})$               | $\beta_6$                                                                         |        |
| $q_{25}$              | $\delta(\text{C-O-C})$               | $\beta_7$                                                                         |        |
| $q_{26}$              | $\delta(\text{C-N-N})$               | $\beta_8$                                                                         |        |
| $q_{27}$              | $\delta(\text{N-N-N})$               | $\beta_9$                                                                         |        |
| $q_{28}$              | $\delta(\text{C-H})_{\text{methyl}}$ | $6^{-1/2}(\alpha_1+\alpha_2+\alpha_3+\alpha'_1-\alpha'_2-\alpha'_3)$              |        |
| $q_{29}$              | $\delta(\text{C-H})_{\text{methyl}}$ | $6^{-1/2}(2\alpha_1-\alpha_2-\alpha_3)$                                           |        |
| $q_{30}$              | $\delta(\text{C-H})_{\text{methyl}}$ | $2^{-1/2}(\alpha_2-\alpha_3)$                                                     |        |
| $q_{31}$              | $\delta(\text{C-H})_{\text{methyl}}$ | $6^{-1/2}(2\alpha'_1-\alpha'_2-\alpha'_3)$                                        |        |
| $q_{32}$              | $\delta(\text{C-H})_{\text{methyl}}$ | $2^{-1/2}(\alpha'_2-\alpha'_3)$                                                   |        |
| $q_{33}$              | $\delta(\text{C-C-C})$               | $6^{-1/2}(\alpha_4-\alpha_5+\alpha_6-\alpha_7+\alpha_8-\alpha_9)$                 | 12     |
| $q_{34}$              | $\delta(\text{C-C-C})$               | $12^{-1/2}(2\alpha_4-\alpha_5-\alpha_6+2\alpha_7-\alpha_8-\alpha_9)$              | 6a     |
| $q_{35}$              | $\delta(\text{C-C-C})$               | $2^{-1}(\alpha_5-\alpha_6+\alpha_8-\alpha_9)$                                     | 6b     |
| $q_{36} \dots q_{39}$ | $\gamma(\text{C-H})$                 | $\gamma_1 \dots \gamma_4$                                                         |        |
| $q_{40}$              | $\gamma(\text{C-N})$                 | $\gamma_5$                                                                        |        |
| $q_{41}$              | $\gamma(\text{O-C})$                 | $\gamma_6$                                                                        |        |
| $q_{42}$              | $\Gamma(\text{CC})$                  | $6^{-1/2}(\Gamma_1-\Gamma_2+\Gamma_3-\Gamma_4+\Gamma_5-\Gamma_6)$                 |        |
| $q_{43}$              | $\Gamma(\text{CC})$                  | $2^{-1}(\Gamma_1+\Gamma_3+\Gamma_4+\Gamma_6)$                                     |        |

Continue

**Table S3b.** Continuation

---

|          |                     |                                                                       |
|----------|---------------------|-----------------------------------------------------------------------|
| $q_{44}$ | $\Gamma(\text{CC})$ | $12^{-1/2}(-\Gamma_1+2\Gamma_2-\Gamma_3-\Gamma_4+2\Gamma_5-\Gamma_6)$ |
| $q_{45}$ | $\Gamma(\text{OC})$ | $\Gamma_7$                                                            |
| $q_{46}$ | $\Gamma(\text{CO})$ | $\Gamma_8$                                                            |
| $q_{47}$ | $\Gamma(\text{CN})$ | $\Gamma_9$                                                            |
| $q_{48}$ | $\Gamma(\text{NN})$ | $\Gamma_{10}$                                                         |

---





**Table S4.** Definition of redundant internal coordinates of 4-methoxyphenyl nitrene.

| $N^o$ | <i>Coord.</i> | <i>Connectivity</i> | <i>type</i>                        |
|-------|---------------|---------------------|------------------------------------|
| 1     | $r_1$         | 9-14                | $\nu(\text{C-H})_{\text{methyl}}$  |
| 2     | $r_2$         | 9-15                | $\nu(\text{C-H})_{\text{methyl}}$  |
| 3     | $r_3$         | 9-16                | $\nu(\text{C-H})_{\text{methyl}}$  |
| 4     | $r_4$         | 3-10                | $\nu(\text{C-H})_{\text{ring}}$    |
| 5     | $r_5$         | 4-11                | $\nu(\text{C-H})_{\text{ring}}$    |
| 6     | $r_6$         | 5-12                | $\nu(\text{C-H})_{\text{ring}}$    |
| 7     | $r_7$         | 6-13                | $\nu(\text{C-H})_{\text{ring}}$    |
| 8     | $r_8$         | 7-8                 | $\nu(\text{C-O})$                  |
| 9     | $r_9$         | 8-9                 | $\nu(\text{O-CH}_3)$               |
| 10    | $r_{10}$      | 2-1                 | $\nu(\text{N-C}_{\text{ring}})$    |
| 11    | $R_1$         | 2-3                 | $\nu(\text{C-C})$                  |
| 12    | $R_2$         | 3-5                 | $\nu(\text{C-C})$                  |
| 13    | $R_3$         | 5-7                 | $\nu(\text{C-C})$                  |
| 14    | $R_4$         | 7-6                 | $\nu(\text{C-C})$                  |
| 15    | $R_5$         | 4-2                 | $\nu(\text{C-C})$                  |
| 16    | $R_6$         | 6-4                 | $\nu(\text{C-C})$                  |
| 17    | $\beta_1$     | [10-3-2]-[10-3-5]   | $\delta(\text{C-H})_{\text{ring}}$ |
| 18    | $\beta_2$     | [12-5-7]-[12-5-3]   | $\delta(\text{C-H})_{\text{ring}}$ |
| 19    | $\beta_3$     | [13-6-7]-[13-6-4]   | $\delta(\text{C-H})_{\text{ring}}$ |
| 20    | $\beta_4$     | [11-4-2]-[11-4-6]   | $\delta(\text{C-H})_{\text{ring}}$ |
| 21    | $\beta_5$     | [8-7-5]-[8-7-6]     | $\delta(\text{O-C-C})$             |
| 22    | $\beta_6$     | [1-2-3]-[1-2-4]     | $\delta(\text{N-C-C})$             |
| 23    | $\beta_7$     | [9-8-7]             | $\delta(\text{C-O-C})$             |

Continue

**Table S4.** Continuation

---

|    |             |                    |                                        |
|----|-------------|--------------------|----------------------------------------|
| 24 | $\alpha_1$  | [15-9-16]          | $\delta(\text{H-C-H})_{\text{methyl}}$ |
| 25 | $\alpha_2$  | [14-9-16]          | $\delta(\text{H-C-H})_{\text{methyl}}$ |
| 26 | $\alpha_3$  | [14-9-15]          | $\delta(\text{H-C-H})_{\text{methyl}}$ |
| 27 | $\alpha'_1$ | [14-9-8]           | $\delta(\text{O-C-H})_{\text{methyl}}$ |
| 28 | $\alpha'_2$ | [15-9-8]           | $\delta(\text{O-C-H})_{\text{methyl}}$ |
| 29 | $\alpha'_3$ | [16-9-8]           | $\delta(\text{O-C-H})_{\text{methyl}}$ |
| 30 | $\alpha_4$  | [5-7-6]            | $\delta(\text{C-C-C})_{\text{ring}}$   |
| 31 | $\alpha_5$  | [7-6-4]            | $\delta(\text{C-C-C})_{\text{ring}}$   |
| 32 | $\alpha_6$  | [6-4-2]            | $\delta(\text{C-C-C})_{\text{ring}}$   |
| 33 | $\alpha_7$  | [4-2-3]            | $\delta(\text{C-C-C})_{\text{ring}}$   |
| 34 | $\alpha_8$  | [2-3-5]            | $\delta(\text{C-C-C})_{\text{ring}}$   |
| 35 | $\alpha_9$  | [3-5-7]            | $\delta(\text{C-C-C})_{\text{ring}}$   |
| 36 | $\gamma_1$  | {13-6-7-4}         | $\gamma(\text{C-H})$                   |
| 37 | $\gamma_2$  | {11-4-6-2}         | $\gamma(\text{C-H})$                   |
| 38 | $\gamma_3$  | {10-3-2-5}         | $\gamma(\text{C-H})$                   |
| 39 | $\gamma_4$  | {12-5-3-7}         | $\gamma(\text{C-H})$                   |
| 40 | $\gamma_5$  | {1-2-4-3}          | $\gamma(\text{C-N})$                   |
| 41 | $\gamma_6$  | {8-7-5-6}          | $\gamma(\text{O-C})$                   |
| 42 | $\Gamma_1$  | (5,8)-7-6-(4-13)   | $\Gamma(\text{CC})$                    |
| 43 | $\Gamma_2$  | (7,13)-6-4-(11-2)  | $\Gamma(\text{CC})$                    |
| 44 | $\Gamma_3$  | (6,11)-4-2-(3-1)   | $\Gamma(\text{CC})$                    |
| 45 | $\Gamma_4$  | (4,1)-2-3-(5-10)   | $\Gamma(\text{CC})$                    |
| 46 | $\Gamma_5$  | (2,10)-3-5-(7-12)  | $\Gamma(\text{CC})$                    |
| 47 | $\Gamma_6$  | (3,12)-5-7-(6-8)   | $\Gamma(\text{CC})$                    |
| 48 | $\Gamma_7$  | (5,6)-7-8-(9)      | $\Gamma(\text{C-OCH}_3)$               |
| 49 | $\Gamma_8$  | (14,15,16)-9-8-(7) | $\Gamma(\text{O-CH}_3)$                |

---

**Table S4b.** Non redundant internal coordinates of 4-methoxyphenyl nitrene.

| <i>Coordinate</i>     | <i>Type</i>                          | <i>Definition</i>                                                                 | <i>Wilson</i> |
|-----------------------|--------------------------------------|-----------------------------------------------------------------------------------|---------------|
| $q_1 \dots q_3$       | $\nu(\text{C-H})_{\text{methyl}}$    | $r_1 \dots r_3$                                                                   |               |
| $q_4 \dots q_7$       | $\nu(\text{C-H})_{\text{ring}}$      | $r_4 \dots r_7$                                                                   |               |
| $q_8$                 | $\nu(\text{C-O})$                    | $r_8$                                                                             |               |
| $q_9$                 | $\nu(\text{O-CH}_3)$                 | $r_9$                                                                             |               |
| $q_{10}$              | $\nu(\text{N-C}_{\text{ring}})$      | $r_{10}$                                                                          |               |
| $q_{11}$              | $\nu(\text{C-C})$                    | $6^{-1/2}(\text{R}_1+\text{R}_2+\text{R}_3+\text{R}_4+\text{R}_5+\text{R}_6)$     | 1             |
| $q_{12}$              | $\nu(\text{C-C})$                    | $12^{-1/2}(-\text{R}_1+2\text{R}_2-\text{R}_3-\text{R}_4+2\text{R}_5-\text{R}_6)$ | 8a            |
| $q_{13}$              | $\nu(\text{C-C})$                    | $2^{-1}(-\text{R}_1+\text{R}_3-\text{R}_4+\text{R}_6)$                            | 8b            |
| $q_{14}$              | $\nu(\text{C-C})$                    | $6^{-1/2}(\text{R}_1-\text{R}_2+\text{R}_3-\text{R}_4+\text{R}_5-\text{R}_6)$     | 14            |
| $q_{15}$              | $\nu(\text{C-C})$                    | $2^{-1}(\text{R}_1-\text{R}_3-\text{R}_4+\text{R}_6)$                             | 19a           |
| $q_{16}$              | $\nu(\text{C-C})$                    | $2^{-1/2}(\text{R}_2-\text{R}_5)$                                                 | 19b           |
| $q_{17}$              | $\delta(\text{C-H})_{\text{ring}}$   | $2^{-1}(\beta_1+\beta_2+\beta_3+\beta_4)$                                         | 9a            |
| $q_{18}$              | $\delta(\text{C-H})_{\text{ring}}$   | $2^{-1}(\beta_1+\beta_2-\beta_3-\beta_4)$                                         | 15            |
| $q_{19}$              | $\delta(\text{C-H})_{\text{ring}}$   | $2^{-1}(\beta_1-\beta_2+\beta_3-\beta_4)$                                         | 3             |
| $q_{20}$              | $\delta(\text{C-H})_{\text{ring}}$   | $2^{-1}(\beta_1-\beta_2-\beta_3+\beta_4)$                                         | 18a           |
| $q_{21}$              | $\delta(\text{O-C-C})$               | $\beta_5$                                                                         |               |
| $q_{22}$              | $\delta(\text{N-C-C})$               | $\beta_6$                                                                         |               |
| $q_{23}$              | $\delta(\text{C-O-C})$               | $\beta_7$                                                                         |               |
| $q_{24}$              | $\delta(\text{C-H})_{\text{methyl}}$ | $6^{-1/2}(\alpha_1+\alpha_2+\alpha_3+\alpha'_1-\alpha'_2-\alpha'_3)$              |               |
| $q_{25}$              | $\delta(\text{C-H})_{\text{methyl}}$ | $6^{-1/2}(2\alpha_1-\alpha_2-\alpha_3)$                                           |               |
| $q_{26}$              | $\delta(\text{C-H})_{\text{methyl}}$ | $2^{-1/2}(\alpha_2-\alpha_3)$                                                     |               |
| $q_{27}$              | $\delta(\text{C-H})_{\text{methyl}}$ | $6^{-1/2}(2\alpha'_1-\alpha'_2-\alpha'_3)$                                        |               |
| $q_{28}$              | $\delta(\text{C-H})_{\text{methyl}}$ | $2^{-1/2}(\alpha'_2-\alpha'_3)$                                                   |               |
| $q_{29}$              | $\delta(\text{C-C-C})$               | $6^{-1/2}(\alpha_4-\alpha_5+\alpha_6-\alpha_7+\alpha_8-\alpha_9)$                 | 12            |
| $q_{30}$              | $\delta(\text{C-C-C})$               | $12^{-1/2}(2\alpha_4-\alpha_5-\alpha_6+2\alpha_7-\alpha_8-\alpha_9)$              | 6a            |
| $q_{31}$              | $\delta(\text{C-C-C})$               | $2^{-1}(\alpha_5-\alpha_6+\alpha_8-\alpha_9)$                                     | 6b            |
| $q_{32} \dots q_{35}$ | $\gamma(\text{C-H})$                 | $\gamma_1 \dots \gamma_4$                                                         |               |
| $q_{36}$              | $\gamma(\text{C-N})$                 | $\gamma_5$                                                                        |               |
| $q_{37}$              | $\gamma(\text{O-C})$                 | $\gamma_6$                                                                        |               |
| $q_{38}$              | $\Gamma(\text{CC})$                  | $6^{-1/2}(\Gamma_1-\Gamma_2+\Gamma_3-\Gamma_4+\Gamma_5-\Gamma_6)$                 |               |
| $q_{39}$              | $\Gamma(\text{CC})$                  | $2^{-1}(\Gamma_1+\Gamma_3+\Gamma_4+\Gamma_6)$                                     |               |
| $q_{40}$              | $\Gamma(\text{CC})$                  | $12^{-1/2}(-\Gamma_1+2\Gamma_2-\Gamma_3-\Gamma_4+2\Gamma_5-\Gamma_6)$             |               |
| $q_{41}$              | $\Gamma(\text{CO})$                  | $\Gamma_7$                                                                        |               |
| $q_{42}$              | $\Gamma(\text{OCH}_3)$               | $\Gamma_8$                                                                        |               |

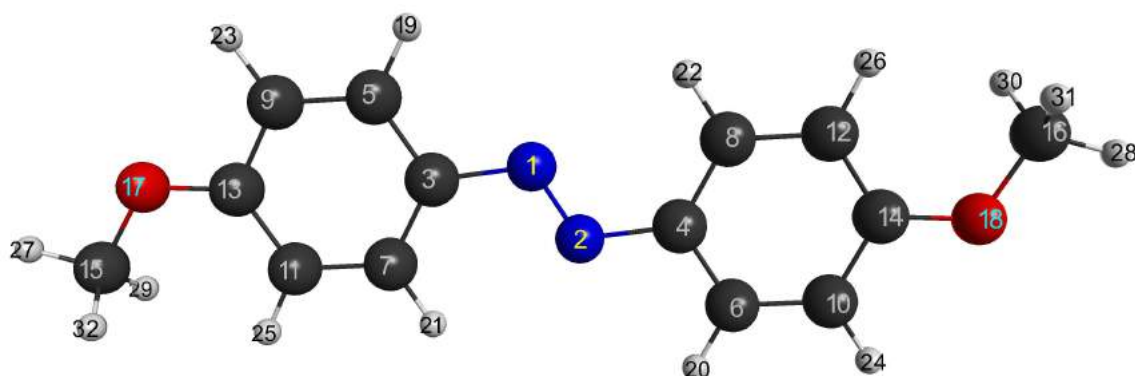

**Table S5.** Definition of redundant internal coordinates of 4,4'-dimethoxyazobenzene.

| $N^{\circ}$ | <i>Coord.</i> | <i>Connectivity</i> | <i>type</i>                       |
|-------------|---------------|---------------------|-----------------------------------|
| 1           | $r_1$         | 15-27               | $\nu(\text{C-H})_{\text{methyl}}$ |
| 2           | $r_2$         | 16-28               | $\nu(\text{C-H})_{\text{methyl}}$ |
| 3           | $r_3$         | 15-29               | $\nu(\text{C-H})_{\text{methyl}}$ |
| 4           | $r_4$         | 16-30               | $\nu(\text{C-H})_{\text{ring}}$   |
| 5           | $r_5$         | 15-32               | $\nu(\text{C-H})_{\text{ring}}$   |
| 6           | $r_6$         | 16-31               | $\nu(\text{C-H})_{\text{ring}}$   |
| 7           | $r_7$         | 5-19                | $\nu(\text{C-H})_{\text{ring}}$   |
| 8           | $r_8$         | 6-20                | $\nu(\text{C-H})_{\text{ring}}$   |
| 9           | $r_9$         | 7-21                | $\nu(\text{C-H})_{\text{ring}}$   |
| 10          | $r_{10}$      | 8-22                | $\nu(\text{C-H})_{\text{ring}}$   |
| 11          | $r_{11}$      | 9-23                | $\nu(\text{C-H})_{\text{ring}}$   |
| 12          | $r_{12}$      | 10-24               | $\nu(\text{C-H})_{\text{ring}}$   |
| 13          | $r_{13}$      | 11-25               | $\nu(\text{C-H})_{\text{ring}}$   |
| 14          | $r_{14}$      | 12-26               | $\nu(\text{C-H})_{\text{ring}}$   |
| 15          | $r_{15}$      | 13-17               | $\nu(\text{C-O})$                 |
| 16          | $r_{16}$      | 14-18               | $\nu(\text{C-O})$                 |
| 17          | $r_{17}$      | 15-17               | $\nu(\text{O-CH}_3)$              |
| 18          | $r_{18}$      | 16-18               | $\nu(\text{O-CH}_3)$              |
| 19          | $r_{19}$      | 1-2                 | $\nu(\text{N-N})$                 |
| 20          | $r_{20}$      | 1-3                 | $\nu(\text{N-C}_{\text{ring}})$   |
| 21          | $r_{21}$      | 2-4                 | $\nu(\text{N-C}_{\text{ring}})$   |
| 22          | $R_1$         | 3-5                 | $\nu(\text{C-C})$                 |
| 23          | $R_2$         | 5-9                 | $\nu(\text{C-C})$                 |
| 24          | $R_3$         | 9-13                | $\nu(\text{C-C})$                 |
| 25          | $R_4$         | 13-11               | $\nu(\text{C-C})$                 |
| 26          | $R_5$         | 11-7                | $\nu(\text{C-C})$                 |
| 27          | $R_6$         | 7-3                 | $\nu(\text{C-C})$                 |

Continue

**Table S5.** Continuation

|    |                 |                       |                            |
|----|-----------------|-----------------------|----------------------------|
| 28 | R <sub>7</sub>  | 4-6                   | v(C-C)                     |
| 29 | R <sub>8</sub>  | 6-10                  | v(C-C)                     |
| 30 | R <sub>9</sub>  | 10-14                 | v(C-C)                     |
| 31 | R <sub>10</sub> | 14-12                 | v(C-C)                     |
| 32 | R <sub>11</sub> | 12-8                  | v(C-C)                     |
| 33 | R <sub>12</sub> | 8-4                   | v(C-C)                     |
| 34 | β <sub>1</sub>  | [19-5-3]-[19-5-9]     | δ(C-H) <sub>ring</sub>     |
| 35 | β <sub>2</sub>  | [23-9-13]-[23-9-5]    | δ(C-H) <sub>ring</sub>     |
| 36 | β <sub>3</sub>  | [25-11-13]-[25-11-7]  | δ(C-H) <sub>ring</sub>     |
| 37 | β <sub>4</sub>  | [21-7-3]-[21-7-11]    | δ(C-H) <sub>ring</sub>     |
| 38 | β <sub>5</sub>  | [20-6-4]-[20-6-10]    | δ(C-H) <sub>ring</sub>     |
| 39 | β <sub>6</sub>  | [24-10-14]-[24-10-6]  | δ(C-H) <sub>ring</sub>     |
| 40 | β <sub>7</sub>  | [26-12-14]-[26-12-8]  | δ(C-H) <sub>ring</sub>     |
| 41 | β <sub>8</sub>  | [22-8-4]-[22-8-12]    | δ(C-H) <sub>ring</sub>     |
| 42 | β <sub>9</sub>  | [17-13-9]-[17-13-11]  | δ(O-C-C)                   |
| 43 | β <sub>10</sub> | [18-14-10]-[18-14-12] | δ(O-C-C)                   |
| 44 | β <sub>11</sub> | [1-3-5]-[1-3-7]       | δ(N-C-C)                   |
| 45 | β <sub>12</sub> | [2-4-6]-[2-4-8]       | δ(N-C-C)                   |
| 46 | β <sub>13</sub> | [3-1-2]               | δ(N-N-C)                   |
| 47 | β <sub>14</sub> | [1-2-4]               | δ(N-N-C)                   |
| 48 | β <sub>15</sub> | [15-17-13]            | δ(C-O-C)                   |
| 49 | β <sub>16</sub> | [16-18-14]            | δ(C-O-C)                   |
| 50 | α <sub>1</sub>  | [27-15-29]            | δ(H-C-H) <sub>methyl</sub> |
| 51 | α <sub>2</sub>  | [29-15-32]            | δ(H-C-H) <sub>methyl</sub> |
| 52 | α <sub>3</sub>  | [32-15-27]            | δ(H-C-H) <sub>methyl</sub> |
| 53 | α' <sub>1</sub> | [27-15-17]            | δ(O-C-H) <sub>methyl</sub> |
| 54 | α' <sub>2</sub> | [29-15-17]            | δ(O-C-H) <sub>methyl</sub> |
| 55 | α' <sub>3</sub> | [32-15-17]            | δ(O-C-H) <sub>methyl</sub> |
| 56 | α <sub>4</sub>  | [28-16-30]            | δ(H-C-H) <sub>methyl</sub> |
| 57 | α <sub>5</sub>  | [30-16-31]            | δ(H-C-H) <sub>methyl</sub> |

Continue

**Table S5.** Continuation

|    |               |                     |                                        |
|----|---------------|---------------------|----------------------------------------|
| 58 | $\alpha_6$    | [31-16-28]          | $\delta(\text{H-C-H})_{\text{methyl}}$ |
| 59 | $\alpha'_4$   | [28-16-18]          | $\delta(\text{O-C-H})_{\text{methyl}}$ |
| 60 | $\alpha'_5$   | [30-16-18]          | $\delta(\text{O-C-H})_{\text{methyl}}$ |
| 61 | $\alpha'_6$   | [31-16-18]          | $\delta(\text{O-C-H})_{\text{methyl}}$ |
| 62 | $\alpha_7$    | [7-3-5]             | $\delta(\text{C-C-C})_{\text{ring}}$   |
| 63 | $\alpha_8$    | [3-5-9]             | $\delta(\text{C-C-C})_{\text{ring}}$   |
| 64 | $\alpha_9$    | [5-9-13]            | $\delta(\text{C-C-C})_{\text{ring}}$   |
| 65 | $\alpha_5$    | [9-13-11]           | $\delta(\text{C-C-C})_{\text{ring}}$   |
| 66 | $\alpha_{10}$ | [13-11-7]           | $\delta(\text{C-C-C})_{\text{ring}}$   |
| 67 | $\alpha_{11}$ | [11-7-3]            | $\delta(\text{C-C-C})_{\text{ring}}$   |
| 68 | $\alpha_{12}$ | [8-4-6]             | $\delta(\text{C-C-C})_{\text{ring}}$   |
| 69 | $\alpha_{13}$ | [4-6-10]            | $\delta(\text{C-C-C})_{\text{ring}}$   |
| 70 | $\alpha_{14}$ | [6-10-14]           | $\delta(\text{C-C-C})_{\text{ring}}$   |
| 71 | $\alpha_{15}$ | [10-14-12]          | $\delta(\text{C-C-C})_{\text{ring}}$   |
| 72 | $\alpha_{16}$ | [14-12-8]           | $\delta(\text{C-C-C})_{\text{ring}}$   |
| 73 | $\alpha_{17}$ | [12-8-4]            | $\delta(\text{C-C-C})_{\text{ring}}$   |
| 74 | $\gamma_1$    | {19-5-4-9}          | $\gamma(\text{C-H})$                   |
| 75 | $\gamma_2$    | {20-6-4-10}         | $\gamma(\text{C-H})$                   |
| 76 | $\gamma_3$    | {21-7-11-3}         | $\gamma(\text{C-H})$                   |
| 77 | $\gamma_4$    | {22-8-12-4}         | $\gamma(\text{C-H})$                   |
| 78 | $\gamma_5$    | {23-9-13-5}         | $\gamma(\text{C-H})$                   |
| 79 | $\gamma_6$    | {24-10-14-6}        | $\gamma(\text{C-H})$                   |
| 80 | $\gamma_7$    | {25-11-13-7}        | $\gamma(\text{C-H})$                   |
| 81 | $\gamma_8$    | {26-12-14-8}        | $\gamma(\text{C-H})$                   |
| 82 | $\gamma_9$    | {1-3-7-5}           | $\gamma(\text{C-N})$                   |
| 83 | $\gamma_{10}$ | {2-4-8-6}           | $\gamma(\text{C-N})$                   |
| 84 | $\gamma_{11}$ | {17-13-9-11}        | $\gamma(\text{O-C})$                   |
| 85 | $\gamma_{12}$ | {18-14-10-12}       | $\gamma(\text{O-C})$                   |
| 86 | $\Gamma_1$    | (1,7)-3-5-(19,9)    | $\Gamma(\text{CC})$                    |
| 87 | $\Gamma_2$    | (19,3)-5-9-(23,13)  | $\Gamma(\text{CC})$                    |
| 88 | $\Gamma_3$    | (23,5)-9-13-(17,11) | $\Gamma(\text{CC})$                    |
| 89 | $\Gamma_4$    | (17,9)-13-11-(25,7) | $\Gamma(\text{CC})$                    |
| 90 | $\Gamma_5$    | (25,13)-11-7-(21,3) | $\Gamma(\text{CC})$                    |
| 91 | $\Gamma_6$    | (21,11)-7-3-(1,5)   | $\Gamma(\text{CC})$                    |

Continue

**Table S5.** Continuation

---

|     |               |                       |                          |
|-----|---------------|-----------------------|--------------------------|
| 92  | $\Gamma_7$    | (2,8)-4-6-(20,10)     | $\Gamma(\text{CC})$      |
| 93  | $\Gamma_8$    | (20,4)-6-10-(24,14)   | $\Gamma(\text{CC})$      |
| 94  | $\Gamma_9$    | (24,6)-10-14-(18,12)  | $\Gamma(\text{CC})$      |
| 95  | $\Gamma_{10}$ | (18,10)-14-12-(26,8)  | $\Gamma(\text{CC})$      |
| 96  | $\Gamma_{11}$ | (26,14)-12-8-(22,4)   | $\Gamma(\text{CC})$      |
| 97  | $\Gamma_{12}$ | (22,12)-8-4-(2,6)     | $\Gamma(\text{CC})$      |
| 99  | $\Gamma_{13}$ | (3)-1-2-(4)           | $\Gamma(\text{NN})$      |
| 100 | $\Gamma_{14}$ | (2)-1-3-(7,5)         | $\Gamma(\text{CN})$      |
| 101 | $\Gamma_{15}$ | (1)-2-4-(8,6)         | $\Gamma(\text{CN})$      |
| 102 | $\Gamma_{16}$ | (15)-17-13-(11,9)     | $\Gamma(\text{C-OCH}_3)$ |
| 103 | $\Gamma_{17}$ | (16)-18-14-(12,10)    | $\Gamma(\text{C-OCH}_3)$ |
| 104 | $\Gamma_{18}$ | (13)-17-15-(27,29,32) | $\Gamma(\text{O-CH}_3)$  |
| 105 | $\Gamma_{19}$ | (14)-18-16-(28,30,31) | $\Gamma(\text{O-CH}_3)$  |

---

**Table S5b.** Non redundant internal coordinates of 4,4'-dimethoxyazobenzene.

| <i>Coordinate</i>     | <i>Type</i>                          | <i>Definition</i>                                                                                            | Wilson |
|-----------------------|--------------------------------------|--------------------------------------------------------------------------------------------------------------|--------|
| $q_1 \dots q_6$       | $\nu(\text{C-H})_{\text{methyl}}$    | $r_1 \dots r_6$                                                                                              |        |
| $q_7 \dots q_{14}$    | $\nu(\text{C-H})_{\text{ring}}$      | $r_7 \dots r_{14}$                                                                                           |        |
| $q_{15,16}$           | $\nu(\text{C-O})$                    | $r_{15,16}$                                                                                                  |        |
| $q_{17,18}$           | $\nu(\text{O-CH}_3)$                 | $r_{17,18}$                                                                                                  |        |
| $q_{19}$              | $\nu(\text{N-N})$                    | $r_{19}$                                                                                                     |        |
| $q_{20,21}$           | $\nu(\text{N-C}_{\text{ring}})$      | $r_{20}, r_{21}$                                                                                             |        |
| $q_{22,23}$           | $\nu(\text{C-C})$                    | $6^{-1/2}(\text{R}_{1,7}+\text{R}_{2,8}+\text{R}_{3,9}+\text{R}_{4,10}+\text{R}_{5,11}+\text{R}_{6,12})$     | 1      |
| $q_{24,25}$           | $\nu(\text{C-C})$                    | $12^{-1/2}(-\text{R}_{1,7}+2\text{R}_{2,8}-\text{R}_{3,9}-\text{R}_{4,10}+2\text{R}_{5,11}-\text{R}_{6,12})$ | 8a     |
| $q_{26,27}$           | $\nu(\text{C-C})$                    | $2^{-1}(-\text{R}_{1,7}+\text{R}_{3,9}-\text{R}_{4,10}+\text{R}_{6,12})$                                     | 8b     |
| $q_{28,29}$           | $\nu(\text{C-C})$                    | $6^{-1/2}(\text{R}_{1,7}-\text{R}_{2,8}+\text{R}_{3,9}-\text{R}_{4,10}+\text{R}_{5,11}-\text{R}_{6,12})$     | 14     |
| $q_{30,31}$           | $\nu(\text{C-C})$                    | $2^{-1}(\text{R}_{1,7}-\text{R}_{3,9}-\text{R}_{4,10}+\text{R}_{6,12})$                                      | 19a    |
| $q_{32,33}$           | $\nu(\text{C-C})$                    | $2^{-1/2}(\text{R}_{2,8}-\text{R}_{5,11})$                                                                   | 19b    |
| $q_{34,35}$           | $\delta(\text{C-H})_{\text{ring}}$   | $2^{-1}(\beta_{1,5}+\beta_{2,6}+\beta_{3,7}+\beta_{4,8})$                                                    | 9a     |
| $q_{36,37}$           | $\delta(\text{C-H})_{\text{ring}}$   | $2^{-1}(\beta_{1,5}+\beta_{2,6}-\beta_{3,7}-\beta_{4,8})$                                                    | 15     |
| $q_{38,39}$           | $\delta(\text{C-H})_{\text{ring}}$   | $2^{-1}(\beta_{1,5}-\beta_{2,6}+\beta_{3,7}-\beta_{4,8})$                                                    | 3      |
| $q_{40,41}$           | $\delta(\text{C-H})_{\text{ring}}$   | $2^{-1}(\beta_{1,5}-\beta_{2,6}-\beta_{3,7}+\beta_{4,8})$                                                    | 18a    |
| $q_{42,43}$           | $\delta(\text{O-C-C})$               | $\beta_{9,10}$                                                                                               |        |
| $q_{44,45}$           | $\delta(\text{N-C-C})$               | $\beta_{11,12}$                                                                                              |        |
| $q_{46,47}$           | $\delta(\text{N-N-C})$               | $\beta_{13,14}$                                                                                              |        |
| $q_{48,49}$           | $\delta(\text{C-O-C})$               | $\beta_{15,16}$                                                                                              |        |
| $q_{50,51}$           | $\delta(\text{C-H})_{\text{methyl}}$ | $6^{-1/2}(\alpha_{1,4}+\alpha_{2,5}+\alpha_{3,6}+\alpha'_{1,4}-\alpha'_{2,5}-\alpha'_{3,6})$                 |        |
| $q_{52,53}$           | $\delta(\text{C-H})_{\text{methyl}}$ | $6^{-1/2}(2\alpha_{1,4}-\alpha_{2,5}-\alpha_{3,6})$                                                          |        |
| $q_{54,55}$           | $\delta(\text{C-H})_{\text{methyl}}$ | $2^{-1/2}(\alpha_{2,5}-\alpha_{3,6})$                                                                        |        |
| $q_{56,57}$           | $\delta(\text{C-H})_{\text{methyl}}$ | $6^{-1/2}(2\alpha'_{1,4}-\alpha'_{2,5}-\alpha'_{3,6})$                                                       |        |
| $q_{58,59}$           | $\delta(\text{C-H})_{\text{methyl}}$ | $2^{-1/2}(\alpha'_{2,5}-\alpha'_{3,6})$                                                                      |        |
| $q_{60,61}$           | $\delta(\text{C-C-C})$               | $6^{-1/2}(\alpha_{7,13}-\alpha_{8,14}+\alpha_{9,15}-\alpha_{10,16}+\alpha_{11,17}-\alpha_{12,18})$           | 12     |
| $q_{62,63}$           | $\delta(\text{C-C-C})$               | $12^{-1/2}(2\alpha_{7,13}-\alpha_{8,14}-\alpha_{9,15}+2\alpha_{10,16}-\alpha_{11,17}-\alpha_{12,18})$        | 6a     |
| $q_{64,65}$           | $\delta(\text{C-C-C})$               | $2^{-1}(\alpha_{8,14}-\alpha_{9,15}+\alpha_{11,17}-\alpha_{12,18})$                                          | 6b     |
| $q_{66} \dots q_{73}$ | $\gamma(\text{C-H})$                 | $\gamma_1 \dots \gamma_8$                                                                                    |        |
| $q_{74,75}$           | $\gamma(\text{C-N})$                 | $\gamma_{9,10}$                                                                                              |        |
| $q_{76,77}$           | $\gamma(\text{O-C})$                 | $\gamma_{11,12}$                                                                                             |        |
| $q_{78,79}$           | $\Gamma(\text{CC})$                  | $6^{-1/2}(\Gamma_{1,7}-\Gamma_{2,8}+\Gamma_{3,9}-\Gamma_{4,10}+\Gamma_{5,11}-\Gamma_{6,12})$                 |        |
| $q_{80,81}$           | $\Gamma(\text{CC})$                  | $2^{-1}(\Gamma_{1,7}+\Gamma_{3,9}+\Gamma_{4,10}+\Gamma_{6,12})$                                              |        |
| $q_{82,83}$           | $\Gamma(\text{CC})$                  | $12^{-1/2}(-\Gamma_{1,7}+2\Gamma_{2,8}-\Gamma_{3,9}-\Gamma_{4,10}+2\Gamma_{5,11}-\Gamma_{6,12})$             |        |
| $q_{84}$              | $\Gamma(\text{NN})$                  | $\Gamma_{13}$                                                                                                |        |
| $q_{85,86}$           | $\Gamma(\text{CN})$                  | $\Gamma_{14,15}$                                                                                             |        |
| $q_{87,88}$           | $\Gamma(\text{C-OCH}_3)$             | $\Gamma_{16,17}$                                                                                             |        |
| $q_{89,90}$           | $\Gamma(\text{O-CH}_3)$              | $\Gamma_{18,19}$                                                                                             |        |



**Table S6.** Assignment of the CAS-SCF vibrational frequencies of 4-methoxyphenyl azide.<sup>a,b</sup>

| $N^{\circ}$ | $Freq(\text{cm}^{-1})$ | $PED^c$                                                     | Assignment                           |
|-------------|------------------------|-------------------------------------------------------------|--------------------------------------|
| 1           | 3364                   | 93 $q_7$                                                    | $\nu(\text{C-H})_{\text{ring}}$      |
| 2           | 3354                   | 52 $q_4 + 46 q_6$                                           | $\nu(\text{C-H})_{\text{ring}}$      |
| 3           | 3337                   | 47 $q_4 + 53 q_6$                                           | $\nu(\text{C-H})_{\text{ring}}$      |
| 4           | 3325                   | 94 $q_5$                                                    | $\nu(\text{C-H})_{\text{ring}}$      |
| 5           | 3268                   | 91 $q_1$                                                    | $\nu(\text{C-H})_{\text{methyl}}$    |
| 6           | 3207                   | 50 $q_2 + 50 q_3$                                           | $\nu(\text{C-H})_{\text{methyl}}$    |
| 7           | 3152                   | 46 $q_2 + 46 q_3$                                           | $\nu(\text{C-H})_{\text{methyl}}$    |
| 8           | 2191                   | 20 $q_{11} + 79 q_{12}$                                     | $\nu(\text{N-N})$                    |
| 9           | 1758                   | 36 $q_{14} + 15 q_{19} + 26 q_{34} + 18 q_{35}$             | 8a                                   |
| 10          | 1712                   | 62 $q_{15} + 13 q_{19}$                                     | 8b                                   |
| 11          | 1657                   | 35 $q_{17} + 14 q_{18} + 32 q_{22}$                         | 19a+18a                              |
| 12          | 1630                   | 89 $q_{29}$                                                 | $\delta(\text{C-H})_{\text{methyl}}$ |
| 13          | 1622                   | 93 $q_{30}$                                                 | $\delta(\text{C-H})_{\text{methyl}}$ |
| 14          | 1606                   | 85 $q_{28}$                                                 | $\delta(\text{C-H})_{\text{methyl}}$ |
| 15          | 1541                   | 49 $q_{18} + 35 q_{20}$                                     | 19b+15                               |
| 16          | 1440                   | 76 $q_{21}$                                                 | 3                                    |
| 17          | 1415                   | 28 $q_8 + 12 q_{10} + 10 q_{13}$                            | $\nu(\text{C-O})$                    |
| 18          | 1384                   | 12 $q_8 + 26 q_{10} + 22 q_{11} + 12 q_{22} + 10 q_{33}$    | $\nu(\text{N-C}_{\text{ring}})$      |
| 19          | 1316                   | 52 $q_{31}$                                                 | $\delta(\text{C-H})_{\text{methyl}}$ |
| 20          | 1282                   | 95 $q_{32}$                                                 | $\delta(\text{C-H})_{\text{methyl}}$ |
| 21          | 1277                   | 21 $q_{14} + 55 q_{19}$                                     | 9a                                   |
| 22          | 1247                   | 53 $q_{16} + 14 q_{20}$                                     | 14                                   |
| 23          | 1216                   | 27 $q_{11} + 10 q_{17} + 13 q_{33}$                         | $\nu(\text{N-N})$                    |
| 24          | 1173                   | 34 $q_{16} + 45 q_{18} + 10 q_{20}$                         | 19b+15                               |
| 25          | 1157                   | 28 $q_9 + 12 q_{13} + 26 q_{16}$                            | $\nu(\text{O-CH}_3)$                 |
| 26          | 1090                   | 44 $q_{17} + 20 q_{18} + 28 q_{33}$                         | 12                                   |
| 27          | 997                    | 34 $q_{38} + 26 q_{39} + 26 q_{44}$                         | $\gamma(\text{C-H})$                 |
| 28          | 953                    | 26 $q_{36} + 26 q_{37} + 21 q_{42} + 12 q_{43} + 11 q_{44}$ | $\gamma(\text{C-H})$                 |
| 29          | 894                    | 22 $q_{13} + 28 q_{34} + 18 q_{35}$                         | 1                                    |
| 30          | 861                    | 28 $q_{38} + 30 q_{39} + 23 q_{43}$                         | $\gamma(\text{C-H})$                 |
| 31          | 832                    | 41 $q_{36} + 37 q_{37}$                                     | $\gamma(\text{C-H})$                 |
| 32          | 828                    | 20 $q_{34} + 16 q_{35} + 10 q_{26}$                         | 6a                                   |
| 33          | 733                    | 19 $q_{40} + 23 q_{41} + 40 q_{42}$                         | $\Gamma(\text{CC})$                  |
| 34          | 688                    | 74 $q_{35}$                                                 | 6b                                   |
| 35          | 674                    | 12 $q_{27} + 34 q_{34}$                                     | $\delta(\text{N-N-N})$               |
| 36          | 575                    | 96 $q_{48}$                                                 | $\Gamma(\text{NN})$                  |
| 37          | 545                    | 23 $q_{23} + 35 q_{25} + 35 q_{34}$                         | $\delta(\text{C-O-C})$               |
| 38          | 544                    | 37 $q_{40} + 39 q_{41}$                                     | $\gamma(\text{C-N})$                 |
| 39          | 450                    | 10 $q_{27} + 31 q_{34} + 41 q_{35}$                         | $\delta(\text{N-N-N})$               |
| 40          | 444                    | 19 $q_{43} + 56 q_{44}$                                     | $\Gamma(\text{CC})$                  |

**Table S6.** Continuation.

|    |     |                                                    |                                   |
|----|-----|----------------------------------------------------|-----------------------------------|
| 41 | 381 | 16 $q_{40}+$ 10 $q_{41}+$ 29 $q_{42}+$ 23 $q_{43}$ | $\Gamma(\text{CC})$               |
| 42 | 366 | 13 $q_{24}+$ 43 $q_{34}+$ 22 $q_{45}$              | $\delta(\text{N-C-C})$            |
| 43 | 263 | 87 $q_{46}$                                        | $\Gamma(\text{O-CH}_3)$           |
| 44 | 257 | 35 $q_{23}+$ 28 $q_{25}+$ 12 $q_{26}+$ 11 $q_{27}$ | $\delta(\text{O-C-C})$            |
| 45 | 165 | 61 $q_{43}$                                        | $\Gamma(\text{CC})$               |
| 46 | 132 | 24 $q_{24}+$ 42 $q_{26}+$ 20 $q_{27}$              | $\delta(\text{C-N-N})$            |
| 47 | 67  | 65 $q_{45}+$ 31 $q_{46}$                           | $\Gamma(\text{OC}_{\text{ring}})$ |
| 48 | 53  | 80 $q_{47}$                                        | $\Gamma(\text{CN})$               |

<sup>a</sup>According with the potential energy distribution matrix (Refs. 32, 33).

<sup>b</sup>Active space: (12e,11o); ANO-RCC[C,N,O/4s3p2d1f||H/3s2p1d].

<sup>c</sup>Potential energy distribution.

**Table S7.** Assignment of the CAS-SCF vibrational frequencies of triplet 4-methoxyphenyl nitrene.<sup>a,b</sup>

| <i>N</i> <sup>o</sup> | <i>Freq</i> (cm <sup>-1</sup> ) | <i>PED</i> <sup>c</sup>                                                                                       | Assignment                           |
|-----------------------|---------------------------------|---------------------------------------------------------------------------------------------------------------|--------------------------------------|
| 1                     | 3365                            | 85 <i>q</i> <sub>7</sub>                                                                                      | $\nu(\text{C-H})_{\text{ring}}$      |
| 2                     | 3353                            | 45 <i>q</i> <sub>4</sub> + 53 <i>q</i> <sub>6</sub>                                                           | $\nu(\text{C-H})_{\text{ring}}$      |
| 3                     | 3339                            | 85 <i>q</i> <sub>5</sub>                                                                                      | $\nu(\text{C-H})_{\text{ring}}$      |
| 4                     | 3335                            | 53 <i>q</i> <sub>4</sub> + 45 <i>q</i> <sub>6</sub>                                                           | $\nu(\text{C-H})_{\text{ring}}$      |
| 5                     | 3273                            | 90 <i>q</i> <sub>1</sub>                                                                                      | $\nu(\text{C-H})_{\text{methyl}}$    |
| 6                     | 3214                            | 50 <i>q</i> <sub>2</sub> + 50 <i>q</i> <sub>3</sub>                                                           | $\nu(\text{C-H})_{\text{methyl}}$    |
| 7                     | 3156                            | 46 <i>q</i> <sub>2</sub> + 46 <i>q</i> <sub>3</sub>                                                           | $\nu(\text{C-H})_{\text{methyl}}$    |
| 8                     | 1696                            | 28 <i>q</i> <sub>12</sub> + 15 <i>q</i> <sub>19</sub> + 21 <i>q</i> <sub>30</sub> + 13 <i>q</i> <sub>31</sub> | <b>8a</b>                            |
| 9                     | 1636                            | 46 <i>q</i> <sub>13</sub> +15 <i>q</i> <sub>17</sub> + 12 <i>q</i> <sub>31</sub>                              | <b>8b</b>                            |
| 10                    | 1630                            | 86 <i>q</i> <sub>25</sub>                                                                                     | $\delta(\text{C-H})_{\text{methyl}}$ |
| 11                    | 1623                            | 93 <i>q</i> <sub>26</sub>                                                                                     | $\delta(\text{C-H})_{\text{methyl}}$ |
| 12                    | 1611                            | 72 <i>q</i> <sub>24</sub>                                                                                     | $\delta(\text{C-H})_{\text{methyl}}$ |
| 13                    | 1590                            | 16 <i>q</i> <sub>15</sub> + 45 <i>q</i> <sub>18</sub> + 13 <i>q</i> <sub>24</sub>                             | <b>9b</b>                            |
| 14                    | 1516                            | 41 <i>q</i> <sub>16</sub> + 30 <i>q</i> <sub>20</sub>                                                         | <b>19b</b>                           |
| 15                    | 1415                            | 35 <i>q</i> <sub>8</sub>                                                                                      | $\nu(\text{C-O})$                    |
| 16                    | 1393                            | 18 <i>q</i> <sub>13</sub> + 44 <i>q</i> <sub>17</sub>                                                         | <b>9a</b>                            |
| 17                    | 1324                            | 21 <i>q</i> <sub>10</sub> + 14 <i>q</i> <sub>19</sub> + 24 <i>q</i> <sub>27</sub>                             | $\nu(\text{N-C}_{\text{ring}})$      |
| 18                    | 1310                            | 17 <i>q</i> <sub>10</sub> + 12 <i>q</i> <sub>19</sub> + 35 <i>q</i> <sub>27</sub>                             | $\delta(\text{C-H})_{\text{methyl}}$ |
| 19                    | 1282                            | 95 <i>q</i> <sub>28</sub>                                                                                     | $\delta(\text{C-H})_{\text{methyl}}$ |
| 20                    | 1228                            | 65 <i>q</i> <sub>14</sub>                                                                                     | <b>14</b>                            |
| 21                    | 1203                            | 14 <i>q</i> <sub>10</sub> + 14 <i>q</i> <sub>12</sub> + 18 <i>q</i> <sub>19</sub> + 14 <i>q</i> <sub>30</sub> | <b>3</b>                             |
| 22                    | 1176                            | 23 <i>q</i> <sub>14</sub> + 53 <i>q</i> <sub>16</sub> + 20 <i>q</i> <sub>20</sub>                             | <b>19b</b>                           |
| 23                    | 1151                            | 38 <i>q</i> <sub>9</sub> + 13 <i>q</i> <sub>30</sub>                                                          | $\nu(\text{O-CH}_3)$                 |
| 24                    | 1047                            | 39 <i>q</i> <sub>15</sub> + 27 <i>q</i> <sub>29</sub>                                                         | <b>19a</b>                           |
| 25                    | 991                             | 28 <i>q</i> <sub>34</sub> + 32 <i>q</i> <sub>35</sub>                                                         | $\gamma(\text{C-H})$                 |
| 26                    | 962                             | 31 <i>q</i> <sub>32</sub> + 22 <i>q</i> <sub>33</sub>                                                         | $\gamma(\text{C-H})$                 |
| 27                    | 868                             | 45 <i>q</i> <sub>11</sub> +21 <i>q</i> <sub>30</sub> + 15 <i>q</i> <sub>31</sub>                              | <b>1</b>                             |
| 28                    | 846                             | 32 <i>q</i> <sub>34</sub> + 18 <i>q</i> <sub>35</sub> + 16 <i>q</i> <sub>39</sub>                             | $\gamma(\text{C-H})$                 |
| 29                    | 818                             | 24 <i>q</i> <sub>32</sub> + 33 <i>q</i> <sub>33</sub> + 14 <i>q</i> <sub>34</sub> + 15 <i>q</i> <sub>39</sub> | $\gamma(\text{C-H})$                 |
| 30                    | 778                             | 21 <i>q</i> <sub>8</sub> + 21 <i>q</i> <sub>29</sub>                                                          | <b>12</b>                            |
| 31                    | 728                             | 22 <i>q</i> <sub>36</sub> + 27 <i>q</i> <sub>37</sub> + 29 <i>q</i> <sub>38</sub>                             | $\gamma(\text{C-N})$                 |
| 32                    | 669                             | 76 <i>q</i> <sub>31</sub>                                                                                     | <b>6b</b>                            |
| 33                    | 555                             | 24 <i>q</i> <sub>23</sub> + 43 <i>q</i> <sub>30</sub>                                                         | <b>6a</b> + $\delta(\text{C-O-C})$   |
| 34                    | 527                             | 33 <i>q</i> <sub>36</sub> + 43 <i>q</i> <sub>37</sub>                                                         | $\gamma(\text{O-C})$                 |
| 35                    | 445                             | 40 <i>q</i> <sub>30</sub> + 47 <i>q</i> <sub>31</sub>                                                         | <b>6b</b>                            |
| 36                    | 427                             | 15 <i>q</i> <sub>39</sub> + 55 <i>q</i> <sub>40</sub>                                                         | $\Gamma(\text{CC})$                  |
| 37                    | 390                             | 53 <i>q</i> <sub>22</sub> + 14 <i>q</i> <sub>23</sub>                                                         | $\delta(\text{N-C-C})$               |
| 38                    | 352                             | 32 <i>q</i> <sub>38</sub> + 21 <i>q</i> <sub>39</sub>                                                         | $\Gamma(\text{CC})$                  |
| 39                    | 257                             | 80 <i>q</i> <sub>42</sub>                                                                                     | $\Gamma(\text{OCH}_3)$               |
| 40                    | 246                             | 44 <i>q</i> <sub>21</sub> + 34 <i>q</i> <sub>23</sub>                                                         | $\delta(\text{O-C-C})$               |
| 41                    | 151                             | 60 <i>q</i> <sub>39</sub> + 20 <i>q</i> <sub>41</sub>                                                         | $\Gamma(\text{CC})$                  |
| 42                    | 69                              | 66 <i>q</i> <sub>41</sub> + 32 <i>q</i> <sub>42</sub>                                                         | $\Gamma(\text{CO})$                  |

<sup>a</sup>According with the potential energy distribution matrix (Refs. 32, 33).<sup>b</sup>Active space: (12e,11o); ANO-RCC[C,N,O/4s3p2d1f||H/3s2p1d].<sup>c</sup>Potential energy distribution.

**Table S8.** Assignment of the CAS-SCF vibrational frequencies of  $1^1A''$  4-methoxyphenyl nitrene.<sup>a,b</sup>

| $N^\circ$ | $Freq(\text{cm}^{-1})$ | $PED^c$                                               | Assignment                           |
|-----------|------------------------|-------------------------------------------------------|--------------------------------------|
| 1         | 3365                   | 43 $q_5$ + 55 $q_7$                                   | $\nu(\text{C-H})_{\text{ring}}$      |
| 2         | 3358                   | 72 $q_4$ + 26 $q_7$                                   | $\nu(\text{C-H})_{\text{ring}}$      |
| 3         | 3346                   | 56 $q_5$ + 26 $q_6$                                   | $\nu(\text{C-H})_{\text{ring}}$      |
| 4         | 3337                   | 23 $q_4$ + 73 $q_6$                                   | $\nu(\text{C-H})_{\text{ring}}$      |
| 5         | 3275                   | 90 $q_1$                                              | $\nu(\text{C-H})_{\text{methyl}}$    |
| 6         | 3217                   | 50 $q_2$ + 50 $q_3$                                   | $\nu(\text{C-H})_{\text{methyl}}$    |
| 7         | 3158                   | 45 $q_2$ + 45 $q_3$                                   | $\nu(\text{C-H})_{\text{methyl}}$    |
| 8         | 1707                   | 28 $q_{12}$ + 15 $q_{17}$ + 25 $q_{30}$ + 17 $q_{31}$ | <b>8a</b>                            |
| 9         | 1650                   | 32 $q_{10}$ +17 $q_{15}$ + 23 $q_{20}$                | $\nu(\text{N-C}_{\text{ring}})$      |
| 10        | 1630                   | 88 $q_{25}$                                           | $\delta(\text{C-H})_{\text{methyl}}$ |
| 11        | 1623                   | 93 $q_{26}$                                           | $\delta(\text{C-H})_{\text{methyl}}$ |
| 12        | 1610                   | 18 $q_{16}$ + 52 $q_{24}$                             | $\delta(\text{C-H})_{\text{methyl}}$ |
| 13        | 1598                   | 28 $q_{16}$ + 18 $q_{24}$                             | <b>19b</b>                           |
| 14        | 1537                   | 27 $q_{10}$ + 11 $q_{19}$ + 26 $q_{20}$               | 18a                                  |
| 15        | 1494                   | 13 $q_{16}$ + 12 $q_{18}$ + 44 $q_{19}$               | 3                                    |
| 16        | 1420                   | 39 $q_8$ + 15 $q_{20}$ + 10 $q_{27}$                  | $\nu(\text{C-O})$                    |
| 17        | 1346                   | 24 $q_{13}$ + 14 $q_{14}$ + 21 $q_{18}$ + 24 $q_{19}$ | <b>8b+3</b>                          |
| 18        | 1322                   | 17 $q_{10}$ + 12 $q_{19}$ + 35 $q_{27}$               | $\delta(\text{C-H})_{\text{methyl}}$ |
| 19        | 1281                   | 95 $q_{28}$                                           | $\delta(\text{C-H})_{\text{methyl}}$ |
| 20        | 1259                   | 23 $q_{14}$ + 32 $q_{17}$                             | <b>9a</b>                            |
| 21        | 1217                   | 45 $q_{14}$ + 13 $q_{16}$ + 11 $q_{17}$               | <b>14</b>                            |
| 22        | 1175                   | 23 $q_{14}$ + 39 $q_{16}$ + 39 $q_{18}$               | <b>19b+15</b>                        |
| 23        | 1153                   | 59 $q_9$                                              | $\nu(\text{O-CH}_3)$                 |
| 24        | 1029                   | 36 $q_{15}$ + 51 $q_{29}$                             | <b>12</b>                            |
| 25        | 979                    | 19 $q_{34}$ + 47 $q_{35}$ + 23 $q_{40}$               | $\gamma(\text{C-H})$                 |
| 26        | 952                    | 50 $q_{32}$ + 12 $q_{33}$ + 12 $q_{38}$ + 17 $q_{40}$ | $\gamma(\text{C-H})$                 |
| 27        | 818                    | 50 $q_{11}$ +12 $q_{15}$ + 14 $q_{30}$                | <b>1</b>                             |
| 28        | 800                    | 16 $q_{33}$ + 41 $q_{34}$ + 23 $q_{36}$               | $\gamma(\text{C-H})$                 |
| 29        | 768                    | 18 $q_8$ + 20 $q_{15}$ + 17 $q_{29}$                  | 19a+12                               |
| 30        | 744                    | 39 $q_{33}$ + 13 $q_{34}$ + 15 $q_{35}$ + 15 $q_{39}$ | $\gamma(\text{C-H})$                 |
| 31        | 683                    | 21 $q_{32}$ + 12 $q_{35}$ + 22 $q_{36}$ + 17 $q_{38}$ | $\gamma(\text{C-N})$                 |
| 32        | 640                    | 20 $q_{13}$ + 68 $q_{31}$                             | <b>6b</b>                            |
| 33        | 547                    | 12 $q_{21}$ + 24 $q_{23}$ + 45 $q_{30}$               | 6a + $\delta(\text{C-O-C})$          |
| 34        | 462                    | 31 $q_{36}$ + 41 $q_{37}$ + 11 $q_{30}$               | $\gamma(\text{O-C})$                 |
| 35        | 442                    | 39 $q_{30}$ + 47 $q_{31}$                             | <b>6a+6b</b>                         |
| 36        | 397                    | 32 $q_{22}$ + 11 $q_{23}$ + 34 $q_{30}$ + 12 $q_{31}$ | $\delta(\text{N-C-C})$               |
| 37        | 364                    | 12 $q_{32}$ + 12 $q_{33}$ + 10 $q_{35}$ + 45 $q_{40}$ | $\Gamma(\text{CC})$                  |
| 38        | 294                    | 15 $q_{37}$ + 16 $q_{38}$ + 13 $q_{39}$ + 43 $q_{42}$ | $\Gamma(\text{OCH}_3)$               |
| 39        | 244                    | 47 $q_{21}$ + 33 $q_{23}$                             | $\delta(\text{O-C-C})$               |
| 40        | 231                    | 17 $q_{37}$ + 25 $q_{38}$ + 16 $q_{39}$ + 29 $q_{42}$ | $\Gamma(\text{CC})$                  |
| 41        | 110                    | 14 $q_{38}$ + 27 $q_{39}$ + 33 $q_{41}$               | $\Gamma(\text{CC})$                  |
| 42        | 62                     | 61 $q_{41}$ + 32 $q_{42}$                             | $\Gamma(\text{CO})$                  |

<sup>a</sup>According with the potential energy distribution matrix (Refs. 32, 33).

<sup>b</sup>Active space: (12e,11o); ANO-RCC[C,N,O/4s3p2d1f||H/3s2p1d].

<sup>c</sup>Potential energy distribution.

**Table S9.** Assignment of the CAS-SCF vibrational frequencies of 1<sup>1</sup>A' 4-methoxyphenyl nitrene.<sup>a,b</sup>

| <i>N</i> <sup>o</sup> | <i>Freq</i> (cm <sup>-1</sup> ) | <i>PED</i> <sup>c</sup>                                                                                       | Assignment                           |
|-----------------------|---------------------------------|---------------------------------------------------------------------------------------------------------------|--------------------------------------|
| 1                     | 3372                            | 24 <i>q</i> <sub>5</sub> + 74 <i>q</i> <sub>7</sub>                                                           | $\nu(\text{C-H})_{\text{ring}}$      |
| 2                     | 3362                            | 71 <i>q</i> <sub>4</sub> + 27 <i>q</i> <sub>6</sub>                                                           | $\nu(\text{C-H})_{\text{ring}}$      |
| 3                     | 3351                            | 75 <i>q</i> <sub>5</sub> + 24 <i>q</i> <sub>7</sub>                                                           | $\nu(\text{C-H})_{\text{ring}}$      |
| 4                     | 3343                            | 28 <i>q</i> <sub>4</sub> + 72 <i>q</i> <sub>6</sub>                                                           | $\nu(\text{C-H})_{\text{ring}}$      |
| 5                     | 3287                            | 89 <i>q</i> <sub>1</sub>                                                                                      | $\nu(\text{C-H})_{\text{methyl}}$    |
| 6                     | 3236                            | 50 <i>q</i> <sub>2</sub> + 50 <i>q</i> <sub>3</sub>                                                           | $\nu(\text{C-H})_{\text{methyl}}$    |
| 7                     | 3170                            | 45 <i>q</i> <sub>2</sub> + 45 <i>q</i> <sub>3</sub>                                                           | $\nu(\text{C-H})_{\text{methyl}}$    |
| 8                     | 1707                            | 35 <i>q</i> <sub>12</sub> + 15 <i>q</i> <sub>17</sub> + 22 <i>q</i> <sub>30</sub> + 15 <i>q</i> <sub>31</sub> | <b>8a</b>                            |
| 9                     | 1667                            | 57 <i>q</i> <sub>13</sub> +14 <i>q</i> <sub>19</sub> + 23 <i>q</i> <sub>20</sub>                              | <b>8b</b>                            |
| 10                    | 1629                            | 70 <i>q</i> <sub>25</sub>                                                                                     | $\delta(\text{C-H})_{\text{methyl}}$ |
| 11                    | 1625                            | 93 <i>q</i> <sub>26</sub>                                                                                     | $\delta(\text{C-H})_{\text{methyl}}$ |
| 12                    | 1624                            | 21 <i>q</i> <sub>24</sub> + 18 <i>q</i> <sub>25</sub>                                                         | $\delta(\text{C-H})_{\text{methyl}}$ |
| 13                    | 1602                            | 25 <i>q</i> <sub>20</sub> + 57 <i>q</i> <sub>24</sub>                                                         | <b>18a</b>                           |
| 14                    | 1534                            | 47 <i>q</i> <sub>16</sub> + 28 <i>q</i> <sub>18</sub>                                                         | <b>19b</b>                           |
| 15                    | 1421                            | 37 <i>q</i> <sub>8</sub> + 13 <i>q</i> <sub>20</sub>                                                          | $\nu(\text{C-O})$                    |
| 16                    | 1396                            | 12 <i>q</i> <sub>13</sub> + 58 <i>q</i> <sub>19</sub>                                                         | <b>3</b>                             |
| 17                    | 1337                            | 42 <i>q</i> <sub>10</sub>                                                                                     | $\nu(\text{N-C}_{\text{ring}})$      |
| 18                    | 1321                            | 25 <i>q</i> <sub>14</sub> + 23 <i>q</i> <sub>27</sub>                                                         | $\delta(\text{C-H})_{\text{methyl}}$ |
| 19                    | 1287                            | 62 <i>q</i> <sub>14</sub> + 19 <i>q</i> <sub>16</sub> + 37 <i>q</i> <sub>17</sub>                             | <b>14</b>                            |
| 20                    | 1282                            | 95 <i>q</i> <sub>28</sub>                                                                                     | $\delta(\text{C-H})_{\text{methyl}}$ |
| 21                    | 1235                            | 13 <i>q</i> <sub>10</sub> + 15 <i>q</i> <sub>12</sub> + 37 <i>q</i> <sub>17</sub>                             | <b>9a</b>                            |
| 22                    | 1185                            | 38 <i>q</i> <sub>16</sub> + 47 <i>q</i> <sub>18</sub>                                                         | <b>15</b>                            |
| 23                    | 1152                            | 72 <i>q</i> <sub>9</sub>                                                                                      | $\nu(\text{O-CH}_3)$                 |
| 24                    | 1078                            | 41 <i>q</i> <sub>15</sub> + 14 <i>q</i> <sub>20</sub> + 44 <i>q</i> <sub>29</sub>                             | <b>12</b>                            |
| 25                    | 1042                            | 49 <i>q</i> <sub>34</sub> + 18 <i>q</i> <sub>35</sub> + 16 <i>q</i> <sub>38</sub>                             | $\gamma(\text{C-H})$                 |
| 26                    | 1038                            | 14 <i>q</i> <sub>32</sub> + 46 <i>q</i> <sub>33</sub> + 22 <i>q</i> <sub>40</sub>                             | $\gamma(\text{C-H})$                 |
| 27                    | 889                             | 40 <i>q</i> <sub>11</sub> +26 <i>q</i> <sub>30</sub> + 19 <i>q</i> <sub>31</sub>                              | <b>1</b>                             |
| 28                    | 889                             | 20 <i>q</i> <sub>32</sub> + 30 <i>q</i> <sub>35</sub> + 14 <i>q</i> <sub>37</sub>                             | $\gamma(\text{C-H})$                 |
| 29                    | 846                             | 45 <i>q</i> <sub>32</sub> + 14 <i>q</i> <sub>33</sub> + 20 <i>q</i> <sub>35</sub>                             | $\gamma(\text{C-H})$                 |
| 30                    | 802                             | 17 <i>q</i> <sub>8</sub> + 21 <i>q</i> <sub>15</sub> + 22 <i>q</i> <sub>29</sub> + 12 <i>q</i> <sub>30</sub>  |                                      |
| 31                    | 783                             | 16 <i>q</i> <sub>36</sub> + 37 <i>q</i> <sub>37</sub> + 27 <i>q</i> <sub>38</sub>                             | $\gamma(\text{O-C})$                 |
| 32                    | 674                             | 15 <i>q</i> <sub>13</sub> + 70 <i>q</i> <sub>31</sub>                                                         | <b>6b</b>                            |
| 33                    | 569                             | 27 <i>q</i> <sub>21</sub> + 27 <i>q</i> <sub>36</sub> + 48 <i>q</i> <sub>37</sub>                             | $\gamma(\text{N-C})$                 |
| 34                    | 562                             | 13 <i>q</i> <sub>21</sub> + 26 <i>q</i> <sub>23</sub> + 42 <i>q</i> <sub>30</sub>                             | $\delta(\text{C-O-C})$               |
| 35                    | 454                             | 36 <i>q</i> <sub>30</sub> + 48 <i>q</i> <sub>31</sub>                                                         | <b>6a</b>                            |
| 36                    | 427                             | 15 <i>q</i> <sub>39</sub> + 61 <i>q</i> <sub>40</sub>                                                         | $\Gamma(\text{CC})$                  |
| 37                    | 410                             | 43 <i>q</i> <sub>22</sub> + 28 <i>q</i> <sub>30</sub>                                                         | $\delta(\text{N-C-C})$               |
| 38                    | 312                             | 29 <i>q</i> <sub>38</sub> + 30 <i>q</i> <sub>39</sub> + 18 <i>q</i> <sub>42</sub>                             | $\Gamma(\text{CC})$                  |
| 39                    | 254                             | 44 <i>q</i> <sub>21</sub> + 42 <i>q</i> <sub>23</sub>                                                         | $\delta(\text{O-C-C})$               |
| 40                    | 237                             | 20 <i>q</i> <sub>38</sub> + 17 <i>q</i> <sub>39</sub> + 49 <i>q</i> <sub>42</sub>                             | $\Gamma(\text{OCH}_3)$               |
| 41                    | 127                             | 20 <i>q</i> <sub>36</sub> + 15 <i>q</i> <sub>38</sub> + 36 <i>q</i> <sub>41</sub>                             | $\Gamma(\text{CC})$                  |
| 42                    | 80                              | 44 <i>q</i> <sub>41</sub> + 18 <i>q</i> <sub>42</sub>                                                         | $\Gamma(\text{CO})$                  |

<sup>a</sup>According with the potential energy distribution matrix (Refs. 32, 33).

<sup>b</sup>Active space: (12e,11o); ANO-RCC[C,N,O/4s3p2d1f||H/3s2p1d].

<sup>c</sup>Potential energy distribution.

**Table S10.** Assignment of the CAS-SCF vibrational frequencies of 4,4'-dimethoxyazobenzene.<sup>a,b</sup>

| <i>N</i> <sup>o</sup> | <i>Freq</i> (cm <sup>-1</sup> ) | <i>PED</i> <sup>c</sup>                                                                                       | Assignment                           |
|-----------------------|---------------------------------|---------------------------------------------------------------------------------------------------------------|--------------------------------------|
| 1                     | 3376                            | 40 <i>q</i> <sub>9</sub> + 40 <i>q</i> <sub>10</sub>                                                          | $\nu(\text{C-H})_{\text{ring}}$      |
| 2                     | 3376                            | 40 <i>q</i> <sub>9</sub> + 40 <i>q</i> <sub>10</sub>                                                          | $\nu(\text{C-H})_{\text{ring}}$      |
| 3                     | 3355                            | 39 <i>q</i> <sub>13</sub> + 39 <i>q</i> <sub>14</sub>                                                         | $\nu(\text{C-H})_{\text{ring}}$      |
| 4                     | 3355                            | 39 <i>q</i> <sub>13</sub> + 39 <i>q</i> <sub>14</sub>                                                         | $\nu(\text{C-H})_{\text{ring}}$      |
| 5                     | 3352                            | 21 <i>q</i> <sub>7</sub> + 21 <i>q</i> <sub>8</sub> + 28 <i>q</i> <sub>11</sub> + 28 <i>q</i> <sub>12</sub>   | $\nu(\text{C-H})_{\text{ring}}$      |
| 6                     | 3352                            | 21 <i>q</i> <sub>7</sub> + 21 <i>q</i> <sub>8</sub> + 28 <i>q</i> <sub>11</sub> + 28 <i>q</i> <sub>12</sub>   | $\nu(\text{C-H})_{\text{ring}}$      |
| 7                     | 3335                            | 28 <i>q</i> <sub>7</sub> + 28 <i>q</i> <sub>8</sub> + 22 <i>q</i> <sub>11</sub> + 22 <i>q</i> <sub>12</sub>   | $\nu(\text{C-H})_{\text{ring}}$      |
| 8                     | 3335                            | 28 <i>q</i> <sub>7</sub> + 28 <i>q</i> <sub>8</sub> + 22 <i>q</i> <sub>11</sub> + 22 <i>q</i> <sub>12</sub>   | $\nu(\text{C-H})_{\text{ring}}$      |
| 9                     | 3269                            | 47 <i>q</i> <sub>1</sub> + 47 <i>q</i> <sub>2</sub>                                                           | $\nu(\text{C-H})_{\text{methyl}}$    |
| 10                    | 3269                            | 47 <i>q</i> <sub>1</sub> + 47 <i>q</i> <sub>2</sub>                                                           | $\nu(\text{C-H})_{\text{methyl}}$    |
| 11                    | 3211                            | 25 <i>q</i> <sub>3</sub> + 25 <i>q</i> <sub>4</sub> + 25 <i>q</i> <sub>5</sub> + 25 <i>q</i> <sub>6</sub>     | $\nu(\text{C-H})_{\text{methyl}}$    |
| 12                    | 3211                            | 25 <i>q</i> <sub>3</sub> + 25 <i>q</i> <sub>4</sub> + 25 <i>q</i> <sub>5</sub> + 25 <i>q</i> <sub>6</sub>     | $\nu(\text{C-H})_{\text{methyl}}$    |
| 13                    | 3154                            | 23 <i>q</i> <sub>3</sub> + 23 <i>q</i> <sub>4</sub> + 23 <i>q</i> <sub>5</sub> + 23 <i>q</i> <sub>6</sub>     | $\nu(\text{C-H})_{\text{methyl}}$    |
| 14                    | 3154                            | 23 <i>q</i> <sub>3</sub> + 23 <i>q</i> <sub>4</sub> + 23 <i>q</i> <sub>5</sub> + 23 <i>q</i> <sub>6</sub>     | $\nu(\text{C-H})_{\text{methyl}}$    |
| 15                    | 1748                            | 26 <i>q</i> <sub>24</sub> + 23 <i>q</i> <sub>25</sub>                                                         | 8a                                   |
| 16                    | 1746                            | 29 <i>q</i> <sub>24</sub> + 29 <i>q</i> <sub>25</sub>                                                         | 8a                                   |
| 17                    | 1720                            | 28 <i>q</i> <sub>26</sub> + 28 <i>q</i> <sub>27</sub>                                                         | 8b                                   |
| 18                    | 1710                            | 34 <i>q</i> <sub>26</sub> + 34 <i>q</i> <sub>27</sub>                                                         | 8b                                   |
| 19                    | 1675                            | 64 <i>q</i> <sub>19</sub>                                                                                     | $\nu(\text{N-N})$                    |
| 20                    | 1659                            | 23 <i>q</i> <sub>40</sub> + 23 <i>q</i> <sub>41</sub> + 16 <i>q</i> <sub>30</sub> + 16 <i>q</i> <sub>31</sub> | 18a+19a                              |
| 21                    | 1652                            | 22 <i>q</i> <sub>40</sub> + 22 <i>q</i> <sub>41</sub> + 14 <i>q</i> <sub>30</sub> + 14 <i>q</i> <sub>31</sub> | 18a+19a                              |
| 22                    | 1630                            | 33 <i>q</i> <sub>34</sub> + 33 <i>q</i> <sub>35</sub>                                                         | 9a                                   |
| 23                    | 1630                            | 33 <i>q</i> <sub>34</sub> + 33 <i>q</i> <sub>35</sub>                                                         | 9a                                   |
| 24                    | 1622                            | 35 <i>q</i> <sub>52</sub> + 35 <i>q</i> <sub>53</sub>                                                         | $\delta(\text{C-H})_{\text{methyl}}$ |
| 25                    | 1622                            | 35 <i>q</i> <sub>52</sub> + 35 <i>q</i> <sub>53</sub>                                                         | $\delta(\text{C-H})_{\text{methyl}}$ |
| 26                    | 1606                            | 44 <i>q</i> <sub>50</sub> + 44 <i>q</i> <sub>51</sub>                                                         | $\delta(\text{C-H})_{\text{methyl}}$ |
| 27                    | 1606                            | 43 <i>q</i> <sub>50</sub> + 43 <i>q</i> <sub>51</sub>                                                         | $\delta(\text{C-H})_{\text{methyl}}$ |
| 28                    | 1536                            | 25 <i>q</i> <sub>32</sub> + 25 <i>q</i> <sub>33</sub> + 17 <i>q</i> <sub>36</sub> + 17 <i>q</i> <sub>37</sub> | 19b                                  |
| 29                    | 1536                            | 24 <i>q</i> <sub>32</sub> + 24 <i>q</i> <sub>33</sub> + 16 <i>q</i> <sub>36</sub> + 16 <i>q</i> <sub>37</sub> | 19b+15                               |
| 30                    | 1436                            | 38 <i>q</i> <sub>38</sub> + 38 <i>q</i> <sub>39</sub>                                                         | 3                                    |
| 31                    | 1429                            | 39 <i>q</i> <sub>38</sub> + 39 <i>q</i> <sub>39</sub>                                                         | 3                                    |
| 32                    | 1406                            | 21 <i>q</i> <sub>15</sub> + 21 <i>q</i> <sub>16</sub>                                                         | $\nu(\text{O-C}_{\text{ring}})$      |
| 33                    | 1402                            | 21 <i>q</i> <sub>15</sub> + 21 <i>q</i> <sub>16</sub>                                                         | $\nu(\text{O-C}_{\text{ring}})$      |
| 34                    | 1338                            | 25 <i>q</i> <sub>20</sub> + 25 <i>q</i> <sub>21</sub>                                                         | $\nu(\text{N-C}_{\text{ring}})$      |
| 35                    | 1326                            | 14 <i>q</i> <sub>56</sub> + 14 <i>q</i> <sub>57</sub>                                                         | $\delta(\text{C-H})_{\text{methyl}}$ |
| 36                    | 1317                            | 23 <i>q</i> <sub>56</sub> + 23 <i>q</i> <sub>57</sub>                                                         | $\delta(\text{C-H})_{\text{methyl}}$ |
| 37                    | 1294                            | 12 <i>q</i> <sub>56</sub> + 12 <i>q</i> <sub>57</sub>                                                         | $\delta(\text{C-H})_{\text{methyl}}$ |
| 38                    | 1282                            | 48 <i>q</i> <sub>58</sub> + 48 <i>q</i> <sub>59</sub>                                                         | $\delta(\text{C-H})_{\text{methyl}}$ |
| 39                    | 1282                            | 48 <i>q</i> <sub>58</sub> + 48 <i>q</i> <sub>59</sub>                                                         | $\delta(\text{C-H})_{\text{methyl}}$ |
| 40                    | 1264                            | 14 <i>q</i> <sub>28</sub> + 14 <i>q</i> <sub>29</sub> + 18 <i>q</i> <sub>34</sub> + 18 <i>q</i> <sub>35</sub> | 9a                                   |
| 41                    | 1258                            | 25 <i>q</i> <sub>34</sub> + 25 <i>q</i> <sub>35</sub>                                                         | 9a                                   |
| 42                    | 1243                            | 24 <i>q</i> <sub>28</sub> + 24 <i>q</i> <sub>29</sub>                                                         | 14                                   |
| 43                    | 1241                            | 23 <i>q</i> <sub>28</sub> + 23 <i>q</i> <sub>29</sub>                                                         | 14                                   |
| 44                    | 1173                            | 16 <i>q</i> <sub>28</sub> + 16 <i>q</i> <sub>29</sub> + 16 <i>q</i> <sub>32</sub> + 16 <i>q</i> <sub>33</sub> | 19b                                  |
| 45                    | 1170                            | 18 <i>q</i> <sub>28</sub> + 18 <i>q</i> <sub>29</sub> + 22 <i>q</i> <sub>32</sub> + 22 <i>q</i> <sub>33</sub> | 19b                                  |
| 46                    | 1164                            | 13 <i>q</i> <sub>17</sub> + 13 <i>q</i> <sub>18</sub> + 18 <i>q</i> <sub>32</sub> + 18 <i>q</i> <sub>33</sub> | $\nu(\text{O-CH}_3)$                 |
| 47                    | 1164                            | 25 <i>q</i> <sub>17</sub> + 25 <i>q</i> <sub>18</sub>                                                         | $\nu(\text{O-CH}_3)$                 |

**Table S10.** Continuation.

|    |      |                                                                                                                  |                                             |
|----|------|------------------------------------------------------------------------------------------------------------------|---------------------------------------------|
| 48 | 1088 | 21 $q_{30}^+$ 21 $q_{31}^+$ 22 $q_{60}^+$ 22 $q_{61}$                                                            | 19a+12                                      |
| 49 | 1088 | 21 $q_{30}^+$ 21 $q_{31}^+$ 22 $q_{60}^+$ 22 $q_{61}$                                                            | 19a+12                                      |
| 50 | 1003 | 11 $q_{67}^+$ 17 $q_{82}^+$ 17 $q_{83}$                                                                          | $\gamma(\text{C-H})$                        |
| 51 | 1003 | 11 $q_{67}^+$ 17 $q_{82}^+$ 17 $q_{83}$                                                                          | $\gamma(\text{C-H})$                        |
| 52 | 992  | 13 $q_{68}^+$ 13 $q_{60}^+$ 14 $q_{78}^+$ 14 $q_{79}$                                                            | $\gamma(\text{C-H})$                        |
| 53 | 989  | 13 $q_{68}^+$ 13 $q_{60}^+$ 14 $q_{78}^+$ 14 $q_{79}$                                                            | $\gamma(\text{C-H})$                        |
| 54 | 988  | 11 $q_{22}^+$ 11 $q_{23}^+$ 20 $q_{46}^+$ 20 $q_{47}$                                                            | $\delta(\text{N-N-C})$                      |
| 55 | 891  | 27 $q_{22}^+$ 27 $q_{23}$                                                                                        | 1                                           |
| 56 | 876  | 17 $q_{70}^+$ 15 $q_{71}$                                                                                        | $\gamma(\text{C-H})$                        |
| 57 | 869  | 19 $q_{70}^+$ 17 $q_{71}$                                                                                        | $\gamma(\text{C-H})$                        |
| 58 | 849  | 13 $q_{22}^+$ 13 $q_{23}^+$ 11 $q_{62}^+$ 11 $q_{63}$                                                            | 1                                           |
| 59 | 847  | 18 $q_{72}^+$ 16 $q_{73}^+$ 21 $q_{80}^+$ 14 $q_{81}$                                                            | $\gamma(\text{C-H})$                        |
| 60 | 846  | 18 $q_{72}^+$ 16 $q_{73}^+$ 21 $q_{80}^+$ 14 $q_{81}$                                                            | $\gamma(\text{C-H})$                        |
| 61 | 800  | 11 $q_{15}^+$ 11 $q_{16}^+$ 13 $q_{60}^+$ 13 $q_{61}$                                                            | 12                                          |
| 62 | 758  | 11 $q_{76}^+$ 11 $q_{77}^+$ 15 $q_{78}^+$ 15 $q_{79}$                                                            | $\gamma(\text{O-C})$                        |
| 63 | 741  | 12 $q_{76}^+$ 12 $q_{77}^+$ 18 $q_{78}^+$ 18 $q_{79}$                                                            | $\gamma(\text{O-C})$                        |
| 64 | 695  | 31 $q_{64}^+$ 31 $q_{65}$                                                                                        | 6b                                          |
| 65 | 682  | 38 $q_{64}^+$ 38 $q_{65}$                                                                                        | 6b                                          |
| 66 | 638  | 17 $q_{62}^+$ 17 $q_{63}$                                                                                        | 6a                                          |
| 67 | 588  | 9 $q_{44}^+$ 9 $q_{45}^+$ 7 $q_{46}^+$ 9 $q_{46}^+$ 13 $q_{64}^+$ 13 $q_{65}$                                    | $\delta(\text{N-C-C})+\delta(\text{N-N-C})$ |
| 68 | 585  | 16 $q_{74}^+$ 14 $q_{75}^+$ 17 $q_{76}^+$ 18 $q_{77}$                                                            | $\gamma(\text{C-N})$                        |
| 69 | 542  | 18 $q_{74}^+$ 15 $q_{75}^+$ 18 $q_{76}^+$ 18 $q_{77}$                                                            | $\gamma(\text{C-N})$                        |
| 70 | 531  | 12 $q_{48}^+$ 12 $q_{49}^+$ 11 $q_{62}^+$ 11 $q_{63}$                                                            | $\delta(\text{C-O-C})$                      |
| 71 | 522  | 15 $q_{42}^+$ 15 $q_{43}^+$ 16 $q_{48}^+$ 16 $q_{49}$                                                            | $\delta(\text{C-O-C})$                      |
| 72 | 450  | 26 $q_{82}^+$ 26 $q_{83}$                                                                                        | $\Gamma(\text{CC})$                         |
| 73 | 450  | 20 $q_{80}^+$ 14 $q_{81}^+$ 15 $q_{82}^+$ 15 $q_{83}$                                                            | $\Gamma(\text{CC})$                         |
| 74 | 443  | 19 $q_{62}^+$ 19 $q_{63}$                                                                                        | 6a                                          |
| 75 | 443  | 12 $q_{78}^+$ 12 $q_{79}$                                                                                        | $\Gamma(\text{CC})$                         |
| 76 | 383  | 13 $q_{74}^+$ 11 $q_{75}^+$ 13 $q_{78}^+$ 13 $q_{79}^+$<br>11 $q_{80}$                                           | $\Gamma(\text{CC})$                         |
| 77 | 325  | 19 $q_{44}^+$ 19 $q_{45}^+$ 17 $q_{48}^+$ 17 $q_{49}$                                                            | $\delta(\text{N-C-C})$                      |
| 78 | 274  | 42 $q_{89}^+$ 42 $q_{90}$                                                                                        | $\Gamma(\text{O-CH}_3)$                     |
| 79 | 263  | 49 $q_{89}^+$ 40 $q_{90}$                                                                                        | $\Gamma(\text{O-CH}_3)$                     |
| 80 | 263  | 20 $q_{42}^+$ 20 $q_{43}^+$ 20 $q_{48}^+$ 20 $q_{49}$                                                            | $\delta(\text{O-C-C})$                      |
| 81 | 249  | 10 $q_{42}^+$ 10 $q_{43}^+$ 13 $q_{62}^+$ 13 $q_{63}$                                                            | $\delta(\text{O-C-C})$                      |
| 82 | 204  | 11 $q_{80}^+$ 21 $q_{84}$                                                                                        | $\Gamma(\text{CC})$                         |
| 83 | 190  | 13 $q_{80}^+$ 29 $q_{85}^+$ 12 $q_{86}$                                                                          | $\Gamma(\text{NN})$                         |
| 84 | 161  | 16 $q_{44}^+$ 16 $q_{45}$                                                                                        | $\delta(\text{N-C-C})$                      |
| 85 | 88   | 24 $q_{66}^+$ 20 $q_{85}^+$ 13 $q_{87}^+$ 13 $q_{88}$                                                            | $\Gamma(\text{CN})$                         |
| 86 | 77   | 30 $q_{87}^+$ 30 $q_{88}^+$ 14 $q_{89}^+$ 13 $q_{90}$<br>13 $q_{66}^+$ 21 $q_{87}^+$ 21 $q_{88}^+$ 12 $q_{89}^+$ | $\Gamma(\text{C-OCH}_3)$                    |
| 87 | 59   | 12 $q_{90}$                                                                                                      | $\Gamma(\text{C-OCH}_3)$                    |
| 88 | 58   | 15 $q_{44}^+$ 15 $q_{45}^+$ 28 $q_{46}^+$ 28 $q_{47}$                                                            | $\delta(\text{N-N-C})+\delta(\text{N-C-C})$ |
| 89 | 33   | 35 $q_{66}^+$ 14 $q_{80}^+$ 10 $q_{84}$                                                                          | $\Gamma(\text{CC})$                         |
| 90 | 20   | 50 $q_{85}^+$ 20 $q_{86}$                                                                                        | $\Gamma(\text{CN})$                         |

<sup>a</sup>According with the potential energy distribution matrix (Refs. 32, 33).

<sup>b</sup>Active space: (16e,15o); ANO-RCC[C,N,O/4s3p2d1f|H/3s2p1d].

<sup>c</sup>Potential energy distribution.

**Table S11.** Assignment of the calculated Resonance Raman spectrum of singlet 4-methoxyphenyl nitrene and 4-methoxyphenyl azide.<sup>a,b</sup>

| <i>CAS-SCF<sup>c</sup></i> | <i>I<sub>rel</sub>(320)</i> | <i>I<sub>rel</sub>(340)</i> | Assignment                      |
|----------------------------|-----------------------------|-----------------------------|---------------------------------|
| 1707                       | 100                         | 80                          | 8a                              |
| 1650                       | 76                          | 100                         | $\nu(\text{N-C}_{\text{ring}})$ |
| 1259                       | 14                          | 12                          | 9a                              |
| 1029                       | 23                          | 34                          | 12                              |

  

| <i>CAS-SCF<sup>d</sup></i> | <i>I<sub>rel</sub>(320)</i> | <i>I<sub>rel</sub>(340)</i> | Assignment                           |
|----------------------------|-----------------------------|-----------------------------|--------------------------------------|
| 1707                       | 100                         | 40                          | 8a                                   |
| 1629                       | 4                           | 11                          | $\delta(\text{C-H})_{\text{methyl}}$ |
| 1624                       | 19                          | 27                          | $\delta(\text{C-H})_{\text{methyl}}$ |
| 1602                       | 4                           | 22                          | 18a                                  |
| 1421                       | 11                          | 65                          | $\nu(\text{C-O})$                    |
| 1337                       | 28                          | 44                          | $\nu(\text{N-C}_{\text{ring}})$      |
| 1235                       | 23                          | 11                          | 9a                                   |
| 1152                       | 19                          | 7                           | $\nu(\text{O-CH}_3)$                 |
| 889                        | 27                          | 100                         | 1                                    |
| 562                        | 44                          | 13                          | $\delta(\text{C-O-C})$               |
| 454                        | 85                          | 34                          | 6a                                   |

  

| <i>CAS-SCF<sup>e</sup></i> | <i>I<sub>rel</sub>(320)</i> | <i>I<sub>rel</sub>(340)</i> | Assignment                      |
|----------------------------|-----------------------------|-----------------------------|---------------------------------|
| 1758                       | 12                          | 39                          | 8a                              |
| 1712                       | 6                           | 10                          | 8b                              |
| 1657                       | 3                           | 11                          | 19a+18a                         |
| 1415                       | 100                         | 100                         | $\nu(\text{C-O})$               |
| 1384                       | 14                          | 76                          | $\nu(\text{N-C}_{\text{ring}})$ |
| 1277                       | 15                          | 18                          | 9a                              |
| 1247                       | 54                          | 33                          | 14                              |
| 1216                       | 31                          | 24                          | $\nu(\text{N-N})$               |
| 1173                       | 49                          | 31                          | 19b+15                          |
| 1157                       | 18                          | 12                          | $\nu(\text{O-CH}_3)$            |
| 894                        | 87                          | 54                          | 1                               |
| 828                        | 22                          | 14                          | 6a                              |

<sup>a</sup>According with the potential energy distribution matrix (Refs. 32, 33).

<sup>b</sup>Active space: (12e,11o); ANO-RCC[C,N,O/4s3p2d1f||H/3s2p1d]; state average: (4 states A', 4 states A"); IPEA=0.25.

<sup>c</sup>1<sup>1</sup>A" 4-methoxyphenyl nitrene. <sup>d</sup>1<sup>1</sup>A' 4-methoxyphenyl nitrene.

<sup>e</sup>4-methoxyphenyl azide.



**Table S12.** Vertical transition energies in eV of triplet 4-methoxyphenyl nitrene (MS-CASPT2),  $C_s$ -symmetry.<sup>a</sup>

| Transition                  | VE <sup>b</sup> | OS <sup>c</sup> | Configuration <sup>d</sup>                                                                     |
|-----------------------------|-----------------|-----------------|------------------------------------------------------------------------------------------------|
| $I^3A'' \rightarrow 2^3A''$ | 3.16            | 0.20-02         | 29% $n_\sigma(N)^1 n_\pi(N)^0 \pi_2^*(ring)^1$<br>36% $n_\sigma(N)^1 \pi_2(ring)^1 n_\pi(N)^2$ |
| $I^3A'' \rightarrow 3^3A''$ | 3.31            | 0.84-02         | 43% $n_\sigma(N)^1 n_\pi(N)^2 \pi_3(ring)^1$<br>24% $n_\sigma(N)^1 \pi_3(ring)^1 n_\pi(N)^0$   |
| $I^3A'' \rightarrow 4^3A''$ | 4.80            | 0.61-03         | 73% $n_\sigma(N)^1 \pi_2(ring)^1 n_\pi(N)^1 \pi_2^*(ring)^1$                                   |
| $I^3A'' \rightarrow I^3A'$  | 4.22            | 0.11-04         | 76% $n_\sigma(N)^2 n_\pi(N)^1 \pi_3(ring)^1$                                                   |
| $I^3A'' \rightarrow 2^3A'$  | 4.24            | 0.83-02         | 76% $n_\sigma(N)^1 \sigma(CN)^1 n_\pi(N)^2$                                                    |
| $I^3A'' \rightarrow 3^3A'$  | 4.85            | 0.19-04         | 68% $n_\sigma(N)^2 \pi_2(ring)^1 n_\pi(N)^1$                                                   |
| $I^3A'' \rightarrow 4^3A'$  | 5.88            | 0.00            | 72% $n_\sigma(N)^2 \pi_2(ring)^1 n_\pi(N)^0 \pi_2^*(ring)^1$                                   |

<sup>a</sup>Four state-average CAS-SCF reference wavefunction: (12e, 11o). ANO-RCC, (C,N)[4s3p2d1f]/(H)[3s2p1d].

<sup>b</sup>Vertical excitation energy in eV.

<sup>c</sup>Oscillator strength, dipole-length formula.

<sup>d</sup>MS-CASPT2 electron configurations. Only contributions greater than 15% are included. Only orbitals with different occupation to the ground state are given.

**Table S13.** Vertical transition energies in eV of  $1^1A''$  4-methoxyphenyl nitrene (MS-CASPT2),  $C_s$ -symmetry.<sup>a</sup>

| Transition                  | VE <sup>b</sup> | OS <sup>c</sup> | Configuration <sup>d</sup>                                                                                   |
|-----------------------------|-----------------|-----------------|--------------------------------------------------------------------------------------------------------------|
| $1^1A'' \rightarrow 2^1A''$ | 2.52            | 0.93-03         | 34% $n_\sigma(N)^1 n_\pi(N)^0 \pi_2^*(ring)^1$<br>40% $n_\sigma(N)^1 \pi_2(ring)^1 n_\pi(N)^0$               |
| $1^1A'' \rightarrow 3^1A''$ | 3.04            | 0.30-02         | 44% $n_\sigma(N)^1 \pi_3(ring)^1 n_\pi(N)^2$<br>32% $n_\sigma(N)^1 n_\pi(N)^0 \pi_2^*(ring)^1$               |
| $1^1A'' \rightarrow 4^1A''$ | 4.67            | 0.22-02         | 25% $n_\sigma(N)^1 n_\pi(N)^2 \pi_1(ring)^1$<br>28% $n_\sigma(N)^1 n_\pi(N)^1 \pi_1(ring)^1 \pi_2^*(ring)^1$ |
| $1^1A'' \rightarrow 1^1A'$  | 0.47            | 0.0             | 83% $n_\sigma(N)^2 n_\pi(N)^0$                                                                               |
| $1^1A'' \rightarrow 2^1A'$  | 1.92            | 0.0             | 71% $n_\sigma(N)^2 n_\pi(N)^2$                                                                               |
| $1^1A'' \rightarrow 3^1A'$  | 4.55            | 0.51-04         | 53% $n_\sigma(N)^2 n_\pi(N)^1 \pi_2(ring)^1$                                                                 |
| $1^1A'' \rightarrow 4^1A'$  | 4.95            | 0.0             | 63% $n_\sigma(N)^2 \pi_3(ring)^1 n_\pi(N)^1$                                                                 |

<sup>a</sup>Four state-average CAS-SCF reference wavefunction: (12e, 11o). ANO-RCC, (C,N)[4s3p2d1f]/(H)[3s2p1d].

<sup>b</sup>Vertical excitation energy in eV.

<sup>c</sup>Oscillator strength, dipole-length formula.

<sup>d</sup>MS-CASPT2 electron configurations. Only contributions greater than 15% are included. Only orbitals with different occupation to the ground state are given.

**Table S14.** Vertical transition energies in eV of  $1^1A'$  4-methoxyphenyl nitrene (MS-CASPT2),  $C_s$ -symmetry.<sup>a</sup>

| Transition                 | VE <sup>b</sup> | OS <sup>c</sup> | Configuration <sup>d</sup>                                                                                                        |
|----------------------------|-----------------|-----------------|-----------------------------------------------------------------------------------------------------------------------------------|
| $1^1A' \rightarrow 2^1A'$  | 1.42            | 0.16-01         | 74% $n_\sigma(N)^0 n_\pi(N)^2$                                                                                                    |
| $1^1A' \rightarrow 3^1A'$  | 3.97            | 0.26-01         | 55% $n_\sigma(N)^2 \pi_2(\text{ring})^1 n_\pi(N)^1$                                                                               |
| $1^1A' \rightarrow 4^1A'$  | 4.39            | 0.3829          | 60% $n_\sigma(N)^2 \pi_3(\text{ring})^1 n_\pi(N)^1$                                                                               |
| $1^1A' \rightarrow 1^1A''$ | -0.30           | 0.0             | 84% $n_\sigma(N)^1 n_\pi(N)^1$                                                                                                    |
| $1^1A' \rightarrow 2^1A''$ | 2.13            | 0.24-04         | 33% $n_\sigma(N)^1 \pi_2^*(\text{ring})^1$<br>40% $n_\sigma(N)^1 \pi_2(\text{ring})^1 n_\pi(N)^2$                                 |
| $1^1A' \rightarrow 3^1A''$ | 2.50            | 0.00            | 46% $n_\sigma(N)^1 n_\pi(N)^1$<br>31% $n_\sigma(N)^1 \pi_3^*(\text{ring})^1$                                                      |
| $1^1A' \rightarrow 4^1A''$ | 3.97            | 0.0             | 18% $n_\sigma(N)^2 \pi_1(\text{ring})^1 n_\pi(N)^2$<br>34% $n_\sigma(N)^1 \pi_1(\text{ring})^1 n_\pi(N)^1 \pi_2^*(\text{ring})^1$ |

<sup>a</sup>Four state-average CAS-SCF reference wavefunction: (12e, 11o). ANO-RCC, (C,N)[4s3p2d1f]/(H)[3s2p1d].

<sup>b</sup>Vertical excitation energy in eV.

<sup>c</sup>Oscillator strength, dipole-length formula.

<sup>d</sup>MS-CASPT2 electron configurations. Only contributions greater than 15% are included. Only orbitals with different occupation to the ground state are given.

**Table S15.** Vertical transition energies in eV of 4,4'-dimethoxyazobenzene  $C_{2h}$  (MS-CASPT2).

| Species                          | VE <sup>a</sup> | OS <sup>b</sup> | Configuration <sup>c</sup>                                                                  |
|----------------------------------|-----------------|-----------------|---------------------------------------------------------------------------------------------|
| 1A <sub>g</sub> →2A <sub>g</sub> | 4.05            | 0.0000          | 24% $\pi_3(b_g)^1\pi^*(NN)^1$<br>22% HF                                                     |
| 1A <sub>g</sub> →3A <sub>g</sub> | 4.76            | 0.0000          | 25% $\pi_3(b_g)^1\pi^*(NN)^1$                                                               |
| 1A <sub>g</sub> →1B <sub>g</sub> | 2.02            | 0.0000          | 75% $\sigma(NN)^1\pi^*(NN)^1$<br>42% $\sigma(NN)^1\pi_2^*(b_g)^1\pi^*(NN)^2$                |
| 1A <sub>g</sub> →2B <sub>g</sub> | 4.22            | 0.0000          | 22% $\sigma(NN)^1\pi_2(b_g)^1$                                                              |
| 1A <sub>g</sub> →3B <sub>g</sub> | 5.00            | 0.0000          | 17% $\sigma(NN)^1\pi_3^*(b_g)^1$<br>22% $\sigma(NN)^1\pi_3(a_u)^1\pi^*(NN)^2$               |
| 1A <sub>g</sub> →1A <sub>u</sub> | 4.10            | 0.72-03         | 23% $\sigma(NN)^1\pi_2^*(a_u)^1$<br>15% $\sigma(NN)^1\pi_3(a_u)^1\pi^*(NN)^2$               |
| 1A <sub>g</sub> →2A <sub>u</sub> | 4.49            | 0.45-03         | 18% $\sigma(NN)^1\pi_2^*(b_g)^1$<br>25% $\sigma(NN)^1\pi_2^*(b_g)^1\pi^*(NN)^1\pi_2(a_u)^1$ |
| 1A <sub>g</sub> →3A <sub>u</sub> | 5.75            | 0.0000          | 22% $\sigma(NN)^1\pi_2(b_g)^1\pi^*(NN)^1\pi_2^*(a_u)^1$                                     |
| 1A <sub>g</sub> →1B <sub>u</sub> | 2.83            | 0.4982          | 73% $\pi_3(b_g)^1\pi_3(a_u)^1\pi^*(NN)^2$<br>26% $\pi_2(a_u)^1\pi^*(NN)^1$                  |
| 1A <sub>g</sub> →2B <sub>u</sub> | 4.04            | 0.16-01         | 17% $\pi_3(a_u)^1\pi_2^*(b_g)^1$                                                            |
| 1A <sub>g</sub> →3B <sub>u</sub> | 6.20            | 0.21-02         | 15% $\pi(NN)^1\pi^*(NN)^1$                                                                  |

<sup>a</sup>Vertical excitation energy in eV.

<sup>b</sup>Oscillator strength.

<sup>c</sup>MS-CASPT2 electron configurations. Only contributions greater than 15% are included. Only orbitals with different occupation to the ground state are given.
